# Supplementary material for: Prioritizing Avian Species for Their Risk of Population-Level Consequences from Wind Energy Development
Source: PLoS One. 2016 Mar 10;11(3):e0150813. doi: 10.1371/journal.pone.0150813 (PMC4786337; doi:10.1371/journal.pone.0150813)
Supplement: S2 Table — Information used to assign priority categories for 428 avian species that occur in the conterminous United States. (XLSX) [file pone.0150813.s002.xlsx]

## Sheet: Sheet1
Scientific name	Common name	Order	% of states in which it occurs that it is considered a species of greatest conservation need	Listed under ESA or Birds of Conservation Concern	IUCN Status	% of US breeding population exposed to turbines	Maternity/ Age at first reproduction	No. suitable habitats	% of US fatality caused by turbines	Fatality risk index (G/H)	Indirect risk index (G/I)	Low turbine risk	Medium turbine risk	High turbine risk	Low conservation status	Medium conservation status	High conservation status	Priority 1	Priority 2	Priority 3	Priority 4	Priority 5	Priority 6	Priority 7	Priority 8	Priority 9	Most Common Priority	Average Priority
Botaurus lentiginosus	American Bittern	Pelecaniformes	0.8		LC	0.062243		1			6.2243	0.03329	0.29456	0.67215	3.906	31.785	64.309	0.00139	0.01017	0.01194	0.02173	0.09313	0.02573	0.18949	0.21455	0.43187	9	7.69416
Asio otus	Long-eared Owl	Strigiformes	0.367347		LC		0.867712	12	0.0505376			0	0	1	40.06	46.286	13.654	0	0	0	0	0	0.4006	0	0.46286	0.13654	8	7.33534
Toxostoma redivivum	California Thrasher	Passeriformes	0.5		LC	0.063371		1			6.3371	0.0278	0.27622	0.69598	24.996	49.764	25.24	0.00676	0.01369	0.06891	0.00735	0.13745	0.17429	0.06986	0.3465	0.17519	8	6.84099
Toxostoma longirostre	Long-billed Thrasher	Passeriformes	0.333333		LC	0.133068		2			6.6534	0.01596	0.2169	0.76714	44.611	44.12	11.269	0.00654	0.00754	0.09639	0.00188	0.09633	0.34318	0.02418	0.33733	0.08663	6	6.50661
Setophaga striata	Blackpoll Warbler	Passeriformes	0.0816327		LC	0.304057	1.57591	4	0.000285425	19.2941	7.60143	0	0	1	84.354	14.923	0.723	0	0	0	0	0	0.84354	0	0.14923	0.00723	6	6.32015
Larus marinus	Great Black-backed Gull	Charadriiformes	0.0465116		LC	0.09366	0.253605	3	0.0018941	36.9314	3.122	0	0	1	90.865	8.92	0.215	0	0	0	0	0	0.90865	0	0.0892	0.00215	6	6.18485
Porzana carolina	Sora	Gruiformes	0.26		LC	0.064888		1			6.4888	0.02155	0.24867	0.72978	54.945	38.146	6.909	0.01117	0.00879	0.13686	0.00159	0.09505	0.40142	0.01676	0.27762	0.05074	6	6.1244
Scolopax minor	American Woodcock	Charadriiformes	0.690476		LC	0.077556	1.0179	2	0.000305447	7.61922	3.8778	0.15067	0.55841	0.29092	9.476	42.488	48.036	0.01458	0.06352	0.05221	0.07257	0.2382	0.02797	0.268	0.12316	0.13979	7	6.06674
Buteo swainsoni	Swainson's Hawk	Accipitriformes	0.333333	BCC	LC	0.072919	0.27101	7	0.00729064	26.9064	1.0417	0.04101	0.41092	0.54807	44.611	44.12	11.269	0.01837	0.01813	0.18284	0.00451	0.1817	0.2449	0.04638	0.24137	0.0618	6	5.81091
Nycticorax nycticorax	Black-crowned Night-Heron	Pelecaniformes	0.62		LC	0.074946	0.468969	4	0.004	15.981	1.87365	0.15716	0.6019	0.24094	14.394	46.857	38.749	0.02275	0.07467	0.08671	0.05974	0.27991	0.03448	0.23528	0.11399	0.09247	5	5.66872
Cardinalis sinuatus	Pyrrhuloxia	Passeriformes	0.0833333		LC	0.063938		1			6.3938	0.02552	0.26622	0.70826	84.032	15.209	0.759	0.02119	0.0042	0.22345	0.00013	0.04076	0.59568	0.00201	0.10713	0.00545	6	5.3985
Ardea herodias	Great Blue Heron	Pelecaniformes	0.36		LC	0.046087	0.213637	4	0.0101777	21.5725	1.15218	0.08042	0.5375	0.38208	41.029	45.821	13.15	0.03313	0.03678	0.22093	0.01051	0.2461	0.15623	0.07047	0.17533	0.05052	5	5.33001
Melanerpes aurifrons	Golden-fronted Woodpecker	Piciformes	1		LC	0.097767		6			1.62945	0.61897	0.33643	0.0446	0	0	100	0	0	0	0.61897	0	0	0.33643	0	0.0446	4	5.23229
Centrocercus urophasianus	Greater Sage-Grouse	Galliformes	1		NT	0.012049		1			1.2049	0.70876	0.26688	0.02436	0	0	100	0	0	0	0.70876	0	0	0.26688	0	0.02436	4	4.92244
Larus argentatus	Herring Gull	Charadriiformes	1		LC	0.052036		8	0.00410939		0.65045	0.70679	0.27965	0.01356	0	0	100	0	0	0	0.70679	0	0	0.27965	0	0.01356	4	4.90675
Toxostoma lecontei	Le Conte's Thrasher	Passeriformes	0.75	BCC	LC	0.024279		1			2.4279	0.46497	0.43444	0.10059	6.12	37.317	56.563	0.02855	0.17362	0.02658	0.2628	0.1615	0.00607	0.24636	0.03805	0.05647	4	4.8878
Callipepla squamata	Scaled Quail	Galliformes	0.714286		LC	0.051977		2			2.59885	0.43472	0.44948	0.1158	8.042	40.665	51.293	0.03504	0.17662	0.03613	0.22306	0.18246	0.00925	0.23089	0.04757	0.05898	7	4.88432
Buteo regalis	Ferruginous Hawk	Accipitriformes	0.53125		LC	0.043985	0.469665	4	0.0126857	9.36519	1.09963	0.23095	0.62796	0.14109	21.985	49.485	28.53	0.05218	0.11415	0.13686	0.06462	0.31066	0.03081	0.18044	0.07004	0.04024	5	4.87326
Aquila chrysaetos	Golden Eagle	Accipitriformes	0.32		LC	0.02399	0.146638	7	0.0154167	16.36	0.342714	0.13747	0.58948	0.27305	46.383	43.205	10.412	0.06457	0.05889	0.273	0.01401	0.25512	0.12626	0.06136	0.11804	0.02875	3	4.72314
Spizella atrogularis	Black-chinned Sparrow	Passeriformes	0.25	BCC	LC	0.045927		1			4.5927	0.16	0.47478	0.36522	56.338	37.3	6.362	0.08969	0.06024	0.26829	0.01007	0.17617	0.2054	0.03032	0.13659	0.02323	3	4.6826
Ammodramus savannarum	Grasshopper Sparrow	Passeriformes	0.791667	E (FL)	LC	0.064751	1.54879	5	1.2011e-05	4.18074	1.29502	0.54223	0.41685	0.04092	4.222	32.783	62.995	0.02322	0.1777	0.01739	0.34131	0.13627	0.00161	0.26319	0.01386	0.02545	4	4.6693
Coccyzus erythropthalmus	Black-billed Cuckoo	Cuculiformes	0.434783		LC	0.0633	1.07531	2		5.88666	3.165	0.24198	0.56466	0.19336	31.969	48.914	19.117	0.07789	0.11863	0.17987	0.04546	0.27578	0.06193	0.10901	0.09473	0.0367	5	4.63829
Parabuteo unicinctus	Harris's Hawk	Accipitriformes	0.133333		LC	0.078108	0.362195	3		21.5652	2.6036	0.07605	0.50575	0.4182	75.183	22.938	1.879	0.05786	0.01674	0.38102	0.00145	0.11563	0.31295	0.0091	0.09701	0.00824	3	4.60999
Setophaga cerulea	Cerulean Warbler	Passeriformes	0.738095	BCC	VU	0.02592	0.57324	2	0.00077957	4.52167	1.296	0.51528	0.44147	0.04325	6.709	38.521	54.77	0.03542	0.19867	0.02892	0.28119	0.1695	0.00275	0.24305	0.01704	0.02346	4	4.55709
Ammodramus nelsoni	Nelson's Sparrow	Passeriformes	0.363636	BCC	LC	0.078361	0.6831	3		11.4714	2.61203	0.20694	0.58953	0.20353	40.592	46.02	13.388	0.08501	0.09435	0.23939	0.02758	0.2713	0.08152	0.07884	0.09455	0.02746	5	4.50324
Rallus limicola	Virginia Rail	Gruiformes	0.306122		LC	0.039973		1			3.9973	0.22672	0.49742	0.27586	48.336	42.121	9.543	0.10955	0.09543	0.24034	0.02174	0.21008	0.13347	0.047	0.1157	0.02669	3	4.45442
Ammodramus henslowii	Henslow's Sparrow	Passeriformes	0.769231	BCC	NT	0.046673		3			1.55577	0.63415	0.3254	0.04045	5.198	35.368	59.434	0.03327	0.22408	0.01673	0.3768	0.11522	0.00198	0.19345	0.01438	0.02409	4	4.3128
Rhynchophanes mccownii	McCown's Longspur	Passeriformes	0.36	BCC	LC	0.070164		2			3.5082	0.29224	0.49594	0.21182	41.029	45.821	13.15	0.11961	0.13433	0.20392	0.0383	0.22683	0.08676	0.06519	0.09705	0.02801	5	4.29276
Tympanuchus cupido	Greater Prairie-Chicken	Galliformes	0.571429	E (TX)	VU	0.049063		2			2.45315	0.4607	0.43662	0.10268	18.405	48.641	32.954	0.08526	0.22385	0.08035	0.15159	0.21204	0.01844	0.14423	0.05052	0.03372	2	4.26846
Bartramia longicauda	Upland Sandpiper	Charadriiformes	0.693878	BCC	LC	0.054516		3			1.8172	0.58145	0.36273	0.05582	9.253	42.253	48.494	0.0543	0.2452	0.03331	0.28195	0.15371	0.00492	0.17571	0.02362	0.02728	4	4.23495
Dolichonyx oryzivorus	Bobolink	Passeriformes	0.510204		LC	0.077214	1.44691	4	0.00122314	5.33647	1.93035	0.39006	0.52653	0.08341	23.96	49.773	26.267	0.09461	0.19408	0.12515	0.10137	0.26179	0.01984	0.13959	0.04186	0.02171	5	4.19909
Podilymbus podiceps	Pied-billed Grebe	Podicipediformes	0.36		LC	0.063673	3.17564	2		2.00504	3.18365	0.30334	0.52036	0.1763	41.029	45.821	13.15	0.12467	0.13883	0.21297	0.03984	0.23884	0.07265	0.06855	0.08054	0.02311	5	4.16286
Molothrus aeneus	Bronzed Cowbird	Passeriformes	0		LC	0.154379		3			5.14597	0.10666	0.43473	0.45861	100	0	0	0.10666	0	0.43473	0	0	0.45861	0	0	0	6	4.16251
Glaucidium gnoma	Northern Pygmy-Owl	Strigiformes	1		LC	0.007643		4			0.191075	0.95124	0.04816	0.0006	0	0	100	0	0	0	0.95124	0	0	0.04816	0	0.0006	4	4.14748
Cistothorus platensis	Sedge Wren	Passeriformes	0.6		LC	0.092639	3.84239	5		2.41097	1.85278	0.50273	0.4352	0.06207	15.998	47.705	36.297	0.08142	0.2398	0.06882	0.18151	0.20722	0.00974	0.15916	0.03003	0.0223	2	4.14312
Campylorhynchus brunneicapillus	Cactus Wren	Passeriformes	0.333333		LC	0.033583	3.18578	1		1.05415	3.3583	0.29604	0.51007	0.19389	44.611	44.12	11.269	0.13228	0.13026	0.22675	0.0335	0.22605	0.08708	0.05727	0.08489	0.02192	3	4.13707
Haliaeetus leucocephalus	Bald Eagle	Accipitriformes	0.979592	BCC	LC	0.022405		9			0.248944	0.93608	0.0629	0.00102	0.04	3.899	96.061	0.00036	0.03633	3e-05	0.89939	0.0026	1e-05	0.06027	6e-05	0.00095	4	4.11465
Ammodramus maritimus	Seaside Sparrow	Passeriformes	0.789474	E (FL), BCC	LC	0.00985	1.09385	1		0.900488	0.985	0.72191	0.26137	0.01672	4.313	33.083	62.604	0.03141	0.23831	0.01108	0.45219	0.08667	0.00064	0.16362	0.00585	0.01023	4	4.07143
Circus cyaneus	Northern Harrier	Accipitriformes	0.68		LC	0.044655	1.0164	8	0.0025	4.39345	0.558188	0.60266	0.37521	0.02213	10.178	43.216	46.606	0.06197	0.26099	0.03744	0.2797	0.16165	0.00237	0.17612	0.00952	0.01024	3	4.0387
Pandion haliaetus	Osprey	Accipitriformes	0.52		LC	0.015119	0.249047	7	0.00880341	6.07074	0.215986	0.45104	0.49211	0.05685	23.008	49.699	27.293	0.10495	0.22385	0.11155	0.12208	0.245	0.01344	0.13556	0.02828	0.01529	5	4
Vireo bellii	Bell's Vireo	Passeriformes	0.377778	E (CA), BCC	NT	0.040911	0.347814	4		11.7623	1.02277	0.35119	0.5302	0.11861	38.779	46.791	14.43	0.13669	0.16451	0.20586	0.04999	0.24717	0.04524	0.07717	0.05623	0.01714	5	3.93483
Spiza americana	Dickcissel	Passeriformes	0.387755	BCC	LC	0.073203	0.903859	4	7.18151e-06	8.09894	1.83008	0.3543	0.54309	0.10261	37.54	47.34	15.12	0.13459	0.16723	0.2028	0.05248	0.25696	0.03801	0.08333	0.04921	0.01539	5	3.91573
Tyto alba	Western Barn Owl	Strigiformes	0.571429		LC	0.100685		12	0.00880376		0.839042	0.53993	0.41909	0.04098	18.405	48.641	32.954	0.10007	0.26207	0.07635	0.17779	0.20421	0.00763	0.13853	0.02013	0.01322	2	3.88098
Toxostoma rufum	Brown Thrasher	Passeriformes	0.346939		LC	0.052541	1.45638	2		3.60764	2.62705	0.34986	0.52334	0.1268	42.769	45.012	12.219	0.15047	0.15686	0.22334	0.04253	0.23615	0.05388	0.06385	0.05711	0.01581	5	3.85448
Colinus virginianus	Northern Bobwhite	Galliformes	0.666667	E (AZ)	NT	0.071529		5			1.43058	0.66038	0.30533	0.03429	11.032	44.223	44.745	0.07342	0.29138	0.03327	0.29558	0.13513	0.00363	0.13693	0.01572	0.01494	4	3.85447
Peucaea cassinii	Cassin's Sparrow	Passeriformes	0.142857		LC	0.078123		2			3.90615	0.23755	0.49913	0.26332	73.535	24.316	2.149	0.17485	0.05758	0.36734	0.00512	0.12109	0.19316	0.0107	0.06449	0.00567	3	3.81877
Agelaius tricolor	Tricolored Blackbird	Passeriformes	0.5	BCC	EN	0.043211		2			2.16055	0.51505	0.40532	0.07963	24.996	49.764	25.24	0.12886	0.25651	0.10148	0.12968	0.20101	0.01962	0.10283	0.04012	0.01989	2	3.80759
Oreortyx pictus	Mountain Quail	Galliformes	0.8		LC	0.021406		3			0.713533	0.82096	0.17034	0.0087	3.906	31.785	64.309	0.03228	0.26045	0.00646	0.52823	0.05462	0.00032	0.10926	0.00278	0.0056	4	3.79796
Toxostoma crissale	Crissal Thrasher	Passeriformes	0.666667		LC	0.011672	0.9615	1		1.21394	1.1672	0.67105	0.30504	0.02391	11.032	44.223	44.745	0.07484	0.29639	0.03306	0.29982	0.13462	0.00242	0.13736	0.01122	0.01027	4	3.79741
Hylocichla mustelina	Wood Thrush	Passeriformes	0.630435	BCC	LC	0.028934	0.986013	3	0.000355012	2.93444	0.964467	0.6387	0.3395	0.0218	13.599	46.413	39.988	0.08755	0.2972	0.04568	0.25395	0.15647	0.00276	0.13735	0.01046	0.00858	2	3.75605
Lanius ludovicianus	Loggerhead Shrike	Passeriformes	0.770833	E (CA), BCC	LC	0.034566	3.2485	6	2.8695e-05	1.06406	0.5761	0.80486	0.18862	0.00652	5.124	35.189	59.687	0.0414	0.28272	0.00959	0.48074	0.06687	0.00025	0.11216	0.0023	0.00397	4	3.73367
Empidonax traillii	Willow Flycatcher	Passeriformes	0.530612	E (AZ, CA, CO, NM, TX, UT), BCC	LC	0.046154	0.805316	5		5.73117	0.92308	0.55295	0.40866	0.03839	22.057	49.489	28.454	0.12271	0.27425	0.08969	0.15599	0.20141	0.00817	0.11756	0.01923	0.01099	2	3.69598
Melozone crissalis	California Towhee	Passeriformes	0.5	T (CA)	LC	0.050214	1.96769	3		2.55192	1.6738	0.52949	0.41877	0.05174	24.996	49.764	25.24	0.13268	0.2635	0.10477	0.13331	0.20783	0.01251	0.10617	0.02631	0.01292	2	3.69139
Falco peregrinus	Peregrine Falcon	Falconiformes	0.88	BCC	LC	0.017284		13			0.132954	0.96605	0.03371	0.00024	1.376	20.945	77.679	0.01327	0.20236	0.00049	0.75042	0.00707	0	0.02615	2e-05	0.00022	4	3.64168
Vermivora cyanoptera	Blue-winged Warbler	Passeriformes	0.5	BCC	LC	0.037375		2	0.00038482		1.86875	0.56237	0.37844	0.05919	24.996	49.764	25.24	0.14104	0.27977	0.09446	0.14156	0.18783	0.01446	0.09615	0.03004	0.01469	2	3.62169
Asio flammeus	Short-eared Owl	Strigiformes	0.8	BCC	LC	0.028657		6			0.477617	0.87831	0.11781	0.00388	3.906	31.785	64.309	0.0342	0.27873	0.00472	0.56538	0.03785	0.00014	0.07524	0.00127	0.00247	4	3.6165
Pooecetes gramineus	Vesper Sparrow	Passeriformes	0.387755		LC	0.070103	1.32469	4	0.000105301	5.29204	1.75257	0.43523	0.49332	0.07145	37.54	47.34	15.12	0.16504	0.20545	0.18368	0.06474	0.23413	0.02668	0.07551	0.03382	0.01095	5	3.61435
Melozone aberti	Abert's Towhee	Passeriformes	0.8		LC	0.010385	0.981684	4		1.05788	0.259625	0.88109	0.11696	0.00195	3.906	31.785	64.309	0.03439	0.27986	0.0046	0.56684	0.03731	7e-05	0.07505	0.00068	0.0012	4	3.60383
Ixobrychus exilis	Least Bittern	Pelecaniformes	0.723404		LC	0.041044		5			0.82088	0.79539	0.19306	0.01155	7.515	39.915	52.57	0.06028	0.31717	0.01406	0.41794	0.07736	0.00081	0.10164	0.00462	0.00612	4	3.60374
Anas acuta	Northern Pintail	Anseriformes	0.46		LC	0.052973	0.878352	5	7.15991e-05	6.03095	1.05946	0.51879	0.43584	0.04537	29.124	49.483	21.393	0.1522	0.25722	0.12623	0.10937	0.21466	0.01281	0.09495	0.02295	0.00961	2	3.56771
Picoides scalaris	Ladder-backed Woodpecker	Piciformes	0.2		LC	0.064374		2			3.2187	0.33409	0.4879	0.17801	63.99	31.927	4.083	0.21452	0.10568	0.3117	0.01389	0.1565	0.11368	0.0197	0.05709	0.00724	3	3.5409
Athene cunicularia	Burrowing Owl	Strigiformes	0.487805		LC	0.080834	2.7639	7	0.00252484	2.92464	1.15477	0.55196	0.41704	0.031	26.211	49.793	23.996	0.14632	0.27446	0.10804	0.13118	0.20764	0.00775	0.10136	0.01583	0.00742	2	3.53172
Sternula antillarum	Least Tern	Charadriiformes	0.6875	E	LC	0.01782		2			0.891	0.77949	0.20716	0.01335	9.673	42.684	47.643	0.07566	0.33262	0.01995	0.37121	0.08833	0.00112	0.09888	0.00589	0.00634	4	3.5303
Charadrius montanus	Mountain Plover	Charadriiformes	0.37931	BCC	NT	0.06985		3			2.32833	0.48297	0.42471	0.09232	38.6	46.873	14.527	0.18706	0.2261	0.16374	0.06981	0.199	0.0352	0.06197	0.04363	0.01349	2	3.52016
Egretta thula	Snowy Egret	Pelecaniformes	0.55102		LC	0.045023		3			1.50077	0.64606	0.31618	0.03776	20.201	49.159	30.64	0.13066	0.31826	0.06395	0.19714	0.15423	0.0074	0.098	0.0191	0.01126	2	3.50328
Melozone fusca	Canyon Towhee	Passeriformes	0		LC	0.041513		1			4.1513	0.20812	0.49416	0.29772	100	0	0	0.20812	0	0.49416	0	0	0.29772	0	0	0	3	3.47692
Passerina ciris	Painted Bunting	Passeriformes	0.276596	BCC	NT	0.07523	2.97675	3		2.52725	2.50767	0.39161	0.49693	0.11146	52.541	39.66	7.799	0.20635	0.15481	0.26139	0.03045	0.19691	0.05767	0.03863	0.04488	0.00891	3	3.46215
Larus delawarensis	Ring-billed Gull	Charadriiformes	0.04		LC	0.069253	0.411773	6	0.00334588	16.8182	1.15422	0.18811	0.58333	0.22856	92.119	7.724	0.157	0.17319	0.01463	0.53742	0.00029	0.04509	0.21058	0.00082	0.01752	0.00046	3	3.45484
Sturnella magna	Eastern Meadowlark	Passeriformes	0.466667		LC	0.060594	1.51538	5	2.52578e-05	3.99861	1.21188	0.562	0.40172	0.03628	28.378	49.564	22.058	0.16081	0.27867	0.11291	0.12252	0.19879	0.01006	0.09002	0.01818	0.00804	2	3.44921
Picoides villosus	Hairy Woodpecker	Piciformes	0.142857		LC	0.031987	1.33172	1	5.34799e-05	2.40193	3.1987	0.29403	0.52682	0.17915	73.535	24.316	2.149	0.21642	0.07125	0.38777	0.00636	0.12809	0.13116	0.01096	0.04382	0.00417	3	3.43989
Setophaga fusca	Blackburnian Warbler	Passeriformes	0.191489		LC	0.060852		2	0.000529506		3.0426	0.35291	0.48802	0.15907	65.363	30.884	3.753	0.23138	0.10823	0.3186	0.0133	0.151	0.10365	0.01842	0.04961	0.00581	3	3.41185
Parkesia motacilla	Louisiana Waterthrush	Passeriformes	0.590909		LC	0.028207	1.827	3		1.5439	0.940233	0.70651	0.2771	0.01639	16.69	48.147	35.163	0.118	0.3408	0.04646	0.24771	0.13241	0.00244	0.09823	0.00826	0.00569	2	3.41141
Perdix perdix	Gray Partridge	Galliformes	0		LC	0.081131	4.34872	3	0.0175648	1.86563	2.70437	0.15979	0.60818	0.23203	100	0	0	0.15979	0	0.60818	0	0	0.23203	0	0	0	3	3.37651
Picoides nuttallii	Nuttall's Woodpecker	Piciformes	0.333333	BCC	LC	0.046785		2			2.33925	0.48118	0.42564	0.09318	44.611	44.12	11.269	0.21504	0.21223	0.19004	0.05391	0.18765	0.04103	0.04795	0.04132	0.01083	1	3.37337
Dendrocygna autumnalis	Black-bellied Whistling-Duck	Anseriformes	0.025		LC	0.076725		2			3.83625	0.2467	0.49984	0.25346	94.996	4.939	0.065	0.23431	0.01218	0.47532	0.00021	0.0242	0.24033	0.00032	0.01301	0.00012	3	3.35585
Cistothorus palustris	Marsh Wren	Passeriformes	0.346939		LC	0.069707	1.74109	4		4.00365	1.74268	0.47412	0.4633	0.06258	42.769	45.012	12.219	0.20402	0.21282	0.19691	0.05728	0.20938	0.02676	0.05701	0.02792	0.0079	2	3.3505
Ictinia mississippiensis	Mississippi Kite	Accipitriformes	0.27907		LC	0.101691		4			2.54228	0.44498	0.44458	0.11044	52.158	39.902	7.94	0.23204	0.17762	0.23278	0.03532	0.17667	0.05676	0.03513	0.04473	0.00895	3	3.33511
Sterna forsteri	Forster's Tern	Charadriiformes	0.4375		LC	0.035533		2			1.77665	0.58928	0.35739	0.05333	31.649	49.021	19.33	0.18634	0.28907	0.11341	0.11387	0.17475	0.01674	0.06923	0.02639	0.0102	2	3.32191
Ammodramus leconteii	Le Conte's Sparrow	Passeriformes	0.270833		LC	0.051051		2			2.55255	0.44295	0.4457	0.11135	53.378	39.094	7.528	0.23653	0.17314	0.23877	0.03328	0.17343	0.05848	0.0335	0.04437	0.0085	3	3.31623
Grus canadensis	Sandhill Crane	Gruiformes	0.42	E (MS)	LC	0.037017		2			1.85085	0.5748	0.36728	0.05792	33.713	48.534	17.753	0.19421	0.27902	0.12348	0.10157	0.17819	0.01944	0.06561	0.02813	0.01035	2	3.31402
Pelecanus erythrorhynchos	American White Pelican	Pelecaniformes	0.428571		LC	0.089277		5			1.78554	0.58764	0.35854	0.05382	32.728	48.747	18.525	0.19211	0.28658	0.11745	0.10895	0.17471	0.01772	0.06638	0.02618	0.00992	2	3.29667
Picoides albolarvatus	White-headed Woodpecker	Piciformes	0.714286	BCC	LC	0.009121		2			0.45605	0.88389	0.11257	0.00354	8.042	40.665	51.293	0.07104	0.35906	0.00911	0.45379	0.04611	0.00027	0.05735	0.00148	0.00179	4	3.29322
Crotophaga sulcirostris	Groove-billed Ani	Cuculiformes	0		LC	0.154678		4			3.86695	0.24279	0.49952	0.25769	100	0	0	0.24279	0	0.49952	0	0	0.25769	0	0	0	3	3.28749
Xanthocephalus xanthocephalus	Yellow-headed Blackbird	Passeriformes	0.122449		LC	0.061929	0.64395	3		9.61705	2.0643	0.29384	0.57017	0.13599	77.032	21.384	1.584	0.22735	0.06231	0.43931	0.00418	0.12149	0.10366	0.00937	0.03004	0.00229	3	3.24255
Accipiter striatus	Sharp-shinned Hawk	Accipitriformes	0.346939		LC	0.044657	0.5445	7		8.20147	0.637957	0.51056	0.43294	0.0565	42.769	45.012	12.219	0.21917	0.22963	0.1847	0.06176	0.1947	0.02382	0.05354	0.02579	0.00689	2	3.2391
Tympanuchus phasianellus	Sharp-tailed Grouse	Galliformes	0.571429		LC	0.025443	3.2391	3	0.000489362	0.785496	0.8481	0.74189	0.24541	0.0127	18.405	48.641	32.954	0.13702	0.36122	0.04483	0.24365	0.11885	0.0022	0.08173	0.00634	0.00416	2	3.23627
Podiceps grisegena	Red-necked Grebe	Podicipediformes	0.12		LC	0.063171		2			3.15855	0.34299	0.48559	0.17142	77.431	21.034	1.535	0.26598	0.07179	0.37614	0.00522	0.10209	0.13219	0.00736	0.03646	0.00277	3	3.23058
Spizella pusilla	Field Sparrow	Passeriformes	0.466667		LC	0.041402	1.40575	4	7.25726e-05	2.94518	1.03505	0.6312	0.34459	0.02421	28.378	49.564	22.058	0.18013	0.31289	0.09713	0.13818	0.17035	0.00652	0.07711	0.0124	0.00529	2	3.22747
Recurvirostra americana	American Avocet	Charadriiformes	0.26		LC	0.049061		2			2.45305	0.4607	0.43662	0.10268	54.945	38.146	6.909	0.25372	0.17505	0.24021	0.03193	0.16652	0.05552	0.02989	0.03989	0.00727	1	3.21167
Rallus elegans	King Rail	Gruiformes	0.789474		LC	0		1			0	1	0	0	4.313	33.083	62.604	0.04313	0.33083	0	0.62604	0	0	0	0	0	4	3.20895
Helmitheros vermivorum	Worm-eating Warbler	Passeriformes	0.565217	BCC	LC	0.016369	1.55723	2		1.05116	0.81845	0.7519	0.2358	0.0123	18.935	48.809	32.256	0.14301	0.36759	0.04414	0.2413	0.11433	0.0022	0.07733	0.00617	0.00393	2	3.1867
Melanerpes erythrocephalus	Red-headed Woodpecker	Piciformes	0.510638	BCC	NT	0.065012	2.53773	8		2.56182	0.81265	0.69141	0.29246	0.01613	23.914	49.775	26.311	0.166	0.34472	0.06948	0.18069	0.14485	0.00366	0.07813	0.00818	0.00429	2	3.18381
Anas crecca	Green-winged Teal	Anseriformes	0.5		LC	0.038553		3			1.2851	0.69148	0.28057	0.02795	24.996	49.764	25.24	0.17281	0.34456	0.07059	0.17411	0.13846	0.00656	0.07152	0.01462	0.00677	2	3.18033
Oreothlypis luciae	Lucy's Warbler	Passeriformes	0.416667	BCC	LC	0.016565		1			1.6565	0.61351	0.34033	0.04616	34.121	48.395	17.484	0.20943	0.29686	0.11626	0.10722	0.16454	0.01552	0.05953	0.02255	0.00809	2	3.16655
Picoides borealis	Red-cockaded Woodpecker	Piciformes	0.777778	E	NT	0	1.06978	2		0	0	1	0	0	4.806	34.475	60.719	0.04806	0.34475	0	0.60719	0	0	0	0	0	4	3.16632
Phalacrocorax auritus	Double-crested Cormorant	Suliformes	0.122449		LC	0.059997		2	0.000828829		2.99985	0.35555	0.48979	0.15466	77.032	21.384	1.584	0.27411	0.07594	0.37787	0.0055	0.1042	0.11834	0.00772	0.0337	0.00262	3	3.15986
Vireo solitarius	Blue-headed Vireo	Passeriformes	0.102041		LC	0.05918	0.619356	3	0.000648976	9.55508	1.97267	0.29652	0.57393	0.12955	80.662	18.219	1.119	0.23986	0.05365	0.46272	0.00301	0.1045	0.10404	0.00671	0.02404	0.00147	3	3.14662
Tringa semipalmata	Willet	Charadriiformes	0.28		LC	0.045093		2			2.25465	0.49707	0.41626	0.08667	52.012	39.989	7.999	0.259	0.19863	0.21681	0.03944	0.16606	0.04431	0.03339	0.0352	0.00716	1	3.14038
Phasianus colchicus	Ring-necked Pheasant	Galliformes	0.05		LC	0.087602	1.703	3	0.000302284	5.14398	2.92007	0.27895	0.55821	0.16284	90.229	9.516	0.255	0.25215	0.02602	0.50439	0.00078	0.05258	0.14575	0.00124	0.01656	0.00053	3	3.10381
Anas rubripes	American Black Duck	Anseriformes	0.468085		LC	0.079044		6			1.3174	0.68434	0.2863	0.02936	28.243	49.595	22.162	0.19313	0.34017	0.08128	0.15104	0.1408	0.00802	0.06422	0.01498	0.00636	2	3.10021
Setophaga caerulescens	Black-throated Blue Warbler	Passeriformes	0.265306		LC	0.07295	2.14307	5	0.00409805	3.40399	1.459	0.45686	0.49291	0.05023	54.174	38.619	7.207	0.24835	0.17637	0.2664	0.03214	0.19046	0.02699	0.03605	0.01936	0.00388	3	3.08524
Agelaius phoeniceus	Red-winged Blackbird	Passeriformes	0.0408163		LC	0.076347	0.964287	3	0.000185054	7.91746	2.5449	0.27293	0.5749	0.15217	91.951	7.884	0.165	0.25131	0.02112	0.52914	0.0005	0.04485	0.13906	0.00091	0.01287	0.00024	3	3.05307
Sterna hirundo	Common Tern	Charadriiformes	0.46		LC	0.050899		4			1.27248	0.69442	0.27821	0.02737	29.124	49.483	21.393	0.20232	0.34389	0.08123	0.14821	0.13703	0.00769	0.05995	0.01391	0.00577	2	3.04078
Chondestes grammacus	Lark Sparrow	Passeriformes	0.22449		LC	0.068265	1.46855	4	1.78031e-05	4.64847	1.70663	0.46166	0.47405	0.06429	60.19	34.657	5.153	0.27986	0.15891	0.28396	0.02289	0.16488	0.03808	0.02521	0.02278	0.00343	3	2.98358
Chlidonias niger	Black Tern	Charadriiformes	0.5		LC	0.077191		8			0.964887	0.76266	0.22186	0.01548	24.996	49.764	25.24	0.19069	0.37975	0.05574	0.19222	0.10977	0.00353	0.05635	0.00812	0.00383	2	2.9502
Baeolophus inornatus	Oak Titmouse	Passeriformes	0.5	BCC	LC	0.03061	2.61225	4		1.17179	0.76525	0.75864	0.23042	0.01094	24.996	49.764	25.24	0.1901	0.378	0.05742	0.19054	0.11385	0.00244	0.05915	0.00579	0.00271	2	2.94917
Catharus guttatus	Hermit Thrush	Passeriformes	0.102041		LC	0.024556	0.20628	3	5.00259e-05	11.9042	0.818533	0.36801	0.51642	0.11557	80.662	18.219	1.119	0.29726	0.06682	0.41617	0.00393	0.09429	0.09319	0.00596	0.02108	0.0013	3	2.94778
Toxostoma bendirei	Bendire's Thrasher	Passeriformes	0.666667	BCC	VU	0.005976		3			0.1992	0.94911	0.05025	0.00064	11.032	44.223	44.745	0.10436	0.42006	0.00588	0.42469	0.0219	8e-05	0.02247	0.00027	0.00029	4	2.93292
Platalea ajaja	Roseate Spoonbill	Pelecaniformes	0.0625		LC	0.059919		2			2.99595	0.36822	0.47783	0.15395	87.843	11.755	0.402	0.32406	0.04275	0.42001	0.00141	0.05601	0.13436	0.00181	0.01879	0.0008	3	2.93163
Peucaea aestivalis	Bachman's Sparrow	Passeriformes	0.708333	BCC	NT	0	1.2852	3		0	0	1	0	0	8.387	41.166	50.447	0.08387	0.41166	0	0.50447	0	0	0	0	0	4	2.92507
Icterus cucullatus	Hooded Oriole	Passeriformes	0.1		LC	0.055532		2			2.7766	0.40448	0.46313	0.13239	81.031	17.893	1.076	0.32799	0.07224	0.37553	0.00425	0.08256	0.10679	0.00504	0.02413	0.00147	3	2.91115
Catharus fuscescens	Veery	Passeriformes	0.244898		LC	0.047534	1.32327	3	0.000363532	3.59216	1.58447	0.5052	0.44345	0.05135	57.122	36.767	6.111	0.28984	0.18503	0.25259	0.03033	0.16343	0.02879	0.02743	0.01921	0.00335	1	2.90472
Bubo virginianus	Great Horned Owl	Strigiformes	0.0612245		LC	0.058109		2	0.000908772		2.90545	0.36993	0.48494	0.14513	88.096	11.516	0.388	0.3263	0.04223	0.42766	0.0014	0.05555	0.127	0.00173	0.01738	0.00075	3	2.89699
Baeolophus ridgwayi	Juniper Titmouse	Passeriformes	0.5		LC	0.015527	2.3607	2		0.657729	0.77635	0.77829	0.21118	0.01053	24.996	49.764	25.24	0.1946	0.38794	0.053	0.19575	0.10411	0.00236	0.05407	0.00559	0.00258	2	2.89362
Antrostomus vociferus	Eastern Whip-poor-will	Caprimulgiformes	0.577778		LC	0.01042		2			0.521	0.86808	0.12725	0.00467	17.79	48.575	33.635	0.15382	0.4224	0.02332	0.29186	0.06094	0.00076	0.04299	0.00241	0.0015	2	2.87899
Corvus brachyrhynchos	American Crow	Passeriformes	0.0408163		LC	0.040437	0.299136	7	8.25848e-05	13.5179	0.577671	0.34456	0.51503	0.14041	91.951	7.884	0.165	0.31661	0.02743	0.4741	0.00052	0.04021	0.1288	0.00072	0.0112	0.00041	3	2.86803
Gelochelidon nilotica	Gull-billed Tern	Charadriiformes	0.433333	BCC	LC	0.080028		7			1.14326	0.72247	0.25564	0.02189	32.154	48.879	18.967	0.23224	0.35379	0.08235	0.13644	0.12417	0.00695	0.04912	0.01083	0.00411	2	2.86265
Plegadis chihi	White-faced Ibis	Pelecaniformes	0.191489		LC	0.022519		1			2.2519	0.49769	0.41587	0.08644	65.363	30.884	3.753	0.32662	0.15272	0.27148	0.01835	0.12846	0.05553	0.01593	0.02766	0.00325	1	2.85742
Coccyzus americanus	Yellow-billed Cuckoo	Cuculiformes	0.5	BCC	LC	0.031513		4	0.00033125		0.787825	0.79294	0.1964	0.01066	24.996	49.764	25.24	0.19836	0.39491	0.0492	0.19967	0.09717	0.0024	0.05003	0.00556	0.0027	2	2.8537
Cyanocorax yncas	Green Jay	Passeriformes	0		LC	0.127164		4			3.1791	0.3398	0.48664	0.17356	100	0	0	0.3398	0	0.48664	0	0	0.17356	0	0	0	3	2.84108
Spizella breweri	Brewer's Sparrow	Passeriformes	0.44	BCC	LC	0.017333	1.35945	2	2.97436e-05	1.275	0.86665	0.73148	0.2547	0.01382	31.321	49.107	19.572	0.22934	0.35981	0.07972	0.14233	0.12427	0.00415	0.05071	0.00699	0.00268	2	2.8387
Aythya affinis	Lesser Scaup	Anseriformes	0.4		LC	0.043733	1.44852	6	0.000128901	3.01914	0.728883	0.68675	0.29731	0.01594	36.07	47.81	16.12	0.24894	0.32821	0.10633	0.1096	0.14202	0.00543	0.04896	0.00787	0.00264	2	2.83487
Cypseloides niger	American Black Swift	Apodiformes	0.571429		LC	0.014347		3			0.478233	0.87831	0.11781	0.00388	18.405	48.641	32.954	0.16113	0.42776	0.02226	0.28942	0.05659	0.00066	0.03896	0.00206	0.00116	2	2.82766
Empidonax minimus	Least Flycatcher	Passeriformes	0.265306		LC	0.05358	0.908065	6	9.21776e-05	5.90046	0.893	0.54961	0.4112	0.03919	54.174	38.619	7.207	0.29902	0.21191	0.22193	0.03868	0.1589	0.02079	0.03037	0.01538	0.00302	1	2.8254
Dendragapus obscurus	Dusky Grouse	Galliformes	0.6		LC	0.006661		2			0.33305	0.91407	0.08409	0.00184	15.998	47.705	36.297	0.14582	0.43595	0.01383	0.3323	0.04013	0.00033	0.03013	0.00097	0.00054	2	2.81457
Certhia americana	Brown Creeper	Passeriformes	0.326531		LC	0.026766	2.42382	2	0.000246725	1.10429	1.3383	0.63319	0.3356	0.03121	45.54	43.619	10.841	0.28797	0.27706	0.15316	0.06816	0.14569	0.01427	0.03675	0.01344	0.0035	1	2.78455
Buteo platypterus	Broad-winged Hawk	Accipitriformes	0.229167		LC	0.022539	0.406106	2		5.55003	1.12695	0.52582	0.43058	0.0436	59.461	35.172	5.367	0.31447	0.18392	0.25473	0.02743	0.15227	0.02541	0.02358	0.01553	0.00266	1	2.78327
Pheucticus ludovicianus	Rose-breasted Grosbeak	Passeriformes	0.183673		LC	0.070632	1.35	5	0.000581454	5.232	1.41264	0.47945	0.4675	0.05305	66.59	29.963	3.447	0.32023	0.14343	0.31062	0.01579	0.14012	0.03505	0.01676	0.01608	0.00192	1	2.77625
Numenius americanus	Long-billed Curlew	Charadriiformes	0.363636	BCC	LC	0.037717		4	0.00323129		0.942925	0.67372	0.30744	0.01884	40.592	46.02	13.388	0.27292	0.31099	0.12533	0.08981	0.14058	0.00767	0.04153	0.00863	0.00254	2	2.76166
Icterus galbula	Baltimore Oriole	Passeriformes	0.145833		LC	0.086682	1.81731	5	3.0383e-05	4.76979	1.73364	0.45376	0.47965	0.06659	73.059	24.716	2.225	0.33282	0.11162	0.34959	0.00932	0.11881	0.04818	0.01125	0.01673	0.00168	3	2.75295
Setophaga virens	Black-throated Green Warbler	Passeriformes	0.229167		LC	0.055886		3	0.000613027		1.86287	0.55831	0.38283	0.05886	59.461	35.172	5.367	0.33256	0.1964	0.22768	0.02935	0.13398	0.03437	0.02117	0.02134	0.00315	1	2.74918
Limosa fedoa	Marbled Godwit	Charadriiformes	0.4	BCC	LC	0.044717		4			1.11793	0.7279	0.25124	0.02086	36.07	47.81	16.12	0.2627	0.34836	0.09051	0.11684	0.1197	0.00749	0.04103	0.01004	0.00333	2	2.73925
Vireo vicinior	Gray Vireo	Passeriformes	0.6		LC	0.007051		3			0.235033	0.93989	0.05923	0.00088	15.998	47.705	36.297	0.14991	0.44865	0.00991	0.34133	0.02793	0.00016	0.02139	0.00047	0.00025	2	2.73861
Leucophaeus pipixcan	Franklin's Gull	Charadriiformes	0.14		LC	0.057019	0.6345	7		8.98645	0.814557	0.459	0.47003	0.07097	74.033	23.9	2.067	0.34033	0.10966	0.34796	0.00901	0.11194	0.05204	0.01013	0.0174	0.00153	3	2.73539
Gymnorhinus cyanocephalus	Pinyon Jay	Passeriformes	0.388889	BCC	VU	0.010942	0.270383	3		4.04686	0.364733	0.71951	0.26608	0.01441	37.392	47.398	15.21	0.27102	0.34005	0.0975	0.10844	0.12714	0.0054	0.04144	0.00679	0.00222	2	2.70986
Spinus lawrencei	Lawrence's Goldfinch	Passeriformes	0.1	BCC	LC	0.049241		2			2.46205	0.45909	0.43741	0.1035	81.031	17.893	1.076	0.37226	0.08198	0.35462	0.00485	0.07803	0.08343	0.00476	0.01892	0.00115	1	2.70524
Arremonops rufivirgatus	Olive Sparrow	Passeriformes	0		LC	0.088806		3			2.9602	0.37459	0.4752	0.15021	100	0	0	0.37459	0	0.4752	0	0	0.15021	0	0	0	3	2.70145
Aythya valisineria	Canvasback	Anseriformes	0.36		LC	0.039461	1.75195	5	0.000721461	2.2524	0.78922	0.68842	0.2971	0.01448	41.029	45.821	13.15	0.28271	0.31614	0.12177	0.08957	0.13543	0.00581	0.0399	0.00664	0.00203	2	2.70128
Accipiter gentilis	Northern Goshawk	Accipitriformes	0.489796		LC	0.009069	0.430044	4		2.10886	0.226725	0.83894	0.15705	0.00401	26.004	49.791	24.205	0.21838	0.41777	0.04059	0.20279	0.07808	0.00107	0.03838	0.00206	0.00088	2	2.67673
Tachycineta bicolor	Tree Swallow	Passeriformes	0.0408163		LC	0.058027	0.957907	3	0.00139764	6.05769	1.93423	0.36941	0.54084	0.08975	91.951	7.884	0.165	0.34021	0.02856	0.49724	0.00064	0.04279	0.08206	0.00081	0.00749	0.0002	3	2.66531
Calcarius ornatus	Chestnut-collared Longspur	Passeriformes	0.230769		NT	0.035568		2			1.7784	0.58913	0.35746	0.05341	59.203	35.342	5.455	0.34928	0.20835	0.21158	0.0315	0.12576	0.03117	0.02012	0.01931	0.00293	1	2.66423
Accipiter cooperii	Cooper's Hawk	Accipitriformes	0.244898		LC	0.034501	0.618125	5	0.000657277	5.58156	0.69002	0.58143	0.38721	0.03136	57.122	36.767	6.111	0.33363	0.21281	0.22025	0.03499	0.14293	0.01734	0.02403	0.01193	0.00209	1	2.66111
Tyrannus tyrannus	Eastern Kingbird	Passeriformes	0.244898		LC	0.049626	0.75294	10	5.73562e-05	6.59096	0.49626	0.59032	0.37282	0.03686	57.122	36.767	6.111	0.3383	0.21627	0.21245	0.03575	0.13737	0.02047	0.023	0.01403	0.00236	1	2.65534
Aimophila ruficeps	Rufous-crowned Sparrow	Passeriformes	0.272727		LC	0.046006		3			1.53353	0.6387	0.32199	0.03931	53.112	39.275	7.613	0.33892	0.25174	0.1716	0.04804	0.12548	0.0206	0.02491	0.01553	0.00318	1	2.62759
Seiurus aurocapilla	Ovenbird	Passeriformes	0.163265		LC	0.042013	0.95598	3	0.00036893	4.39476	1.40043	0.51108	0.44219	0.04673	69.943	27.286	2.771	0.35797	0.13972	0.30888	0.01339	0.12036	0.03258	0.01295	0.01278	0.00137	1	2.62011
Fulica americana	American Coot	Gruiformes	0.14		LC	0.056156	3.51115	3	0.00120863	1.59936	1.87187	0.49822	0.44022	0.06156	74.033	23.9	2.067	0.36936	0.11918	0.32591	0.00968	0.10479	0.04506	0.00952	0.01503	0.00147	1	2.61859
Phalaropus tricolor	Wilson's Phalarope	Charadriiformes	0.36		LC	0.044607		4			1.11518	0.72853	0.25069	0.02078	41.029	45.821	13.15	0.29872	0.33479	0.10304	0.09502	0.11394	0.00853	0.03371	0.00948	0.00277	2	2.61512
Thryomanes bewickii	Bewick's Wren	Passeriformes	0.282609	BCC	LC	0.058549		4			1.46372	0.65385	0.31031	0.03584	51.623	40.217	8.16	0.33728	0.26415	0.1605	0.05242	0.12371	0.01845	0.0261	0.01431	0.00308	1	2.61091
Melospiza georgiana	Swamp Sparrow	Passeriformes	0.102041		LC	0.058094	1.85767	3	0.000291477	3.12726	1.93647	0.46232	0.46725	0.07043	80.662	18.219	1.119	0.37355	0.08376	0.37688	0.00501	0.08501	0.05619	0.00536	0.01342	0.00082	3	2.6062
Gavia immer	Common Loon	Gaviiformes	0.367347		LC	0.031941		3			1.0647	0.7392	0.24179	0.01901	40.06	46.286	13.654	0.29593	0.34308	0.09708	0.10019	0.11104	0.00759	0.03367	0.00874	0.00268	2	2.60456
Aix sponsa	Wood Duck	Anseriformes	0.0816327		LC	0.06148	2.59521	3	0.00159698	2.36898	2.04933	0.44147	0.48258	0.07595	84.354	14.923	0.723	0.37293	0.06548	0.4071	0.00306	0.07204	0.06351	0.00344	0.01171	0.00073	3	2.60302
Buteo jamaicensis	Red-tailed Hawk	Accipitriformes	0.0408163		LC	0.054325	0.494327	8		10.9897	0.679063	0.41126	0.49145	0.09729	91.951	7.884	0.165	0.37787	0.03278	0.45234	0.00061	0.03831	0.0893	0.0008	0.00775	0.00024	3	2.6
Cardellina canadensis	Canada Warbler	Passeriformes	0.346939	BCC	LC	0.043351		4	0.000589317		1.08377	0.71804	0.26209	0.01987	42.769	45.012	12.219	0.30643	0.32455	0.11269	0.08706	0.11677	0.00857	0.03263	0.0088	0.0025	2	2.59842
Falco sparverius	American Kestrel	Falconiformes	0.285714		LC	0.054186		10	0.00664861		0.54186	0.65042	0.32783	0.02175	51.179	40.491	8.33	0.33341	0.26341	0.16723	0.0536	0.13293	0.01115	0.02767	0.00857	0.00203	1	2.58839
Melanerpes lewis	Lewis's Woodpecker	Piciformes	0.517241	BCC	LC	0.008535	1.70533	3		0.500491	0.2845	0.90211	0.09625	0.00164	23.273	49.739	26.988	0.20975	0.44897	0.02253	0.24339	0.04753	0.00045	0.02619	0.00089	0.0003	2	2.58234
Polioptila melanura	Black-tailed Gnatcatcher	Passeriformes	0.333333		LC	0.011786		1			1.1786	0.71462	0.26215	0.02323	44.611	44.12	11.269	0.31836	0.31633	0.11724	0.07993	0.11491	0.01051	0.03	0.00996	0.00276	1	2.57459
Limnothlypis swainsonii	Swainson's Warbler	Passeriformes	0.59375	BCC	LC	0.000466	0.748501	3		0.0622578	0.0155333	0.99288	0.00712	0	16.464	47.992	35.544	0.16333	0.4765	0.00131	0.35305	0.00342	0	0.00239	0	0	2	2.56629
Aphelocoma californica	California Scrub-Jay	Passeriformes	0.2		LC	0.038573	1.1664	3		3.30701	1.28577	0.57338	0.39065	0.03597	63.99	31.927	4.083	0.36758	0.18309	0.24952	0.02271	0.12455	0.0228	0.01658	0.01163	0.00154	1	2.55567
Icterus bullockii	Bullock's Oriole	Passeriformes	0.0434783		LC	0.062904	1.59651	3		3.94009	2.0968	0.42086	0.49385	0.08529	91.428	8.381	0.191	0.38515	0.03479	0.45164	0.00092	0.0414	0.07749	0.00081	0.00762	0.00018	3	2.55352
Bonasa umbellus	Ruffed Grouse	Galliformes	0.390244		LC	0.017887		2			0.89435	0.77882	0.20774	0.01344	37.248	47.429	15.323	0.29016	0.37023	0.07723	0.11843	0.09778	0.00509	0.03273	0.00628	0.00207	2	2.55345
Setophaga ruticilla	American Redstart	Passeriformes	0.122449		LC	0.059663	0.79488	7	0.000445536	7.50591	0.852329	0.49366	0.4526	0.05374	77.032	21.384	1.584	0.38069	0.10543	0.34878	0.00754	0.09648	0.04085	0.00734	0.01193	0.00096	1	2.55101
Toxostoma curvirostre	Curve-billed Thrasher	Passeriformes	0.15		LC	0.049781	1.87245	3		2.6586	1.65937	0.52835	0.42036	0.05129	72.31	25.349	2.341	0.38271	0.13384	0.30376	0.0118	0.10636	0.03663	0.01024	0.01329	0.00137	1	2.55078
Branta canadensis	Canada Goose	Anseriformes	0.1		LC	0.062389	0.74025	8	0.000386386	8.4281	0.779863	0.47566	0.46153	0.06281	81.031	17.893	1.076	0.38553	0.08532	0.37406	0.00481	0.08227	0.05072	0.0052	0.01134	0.00075	1	2.54713
Eremophila alpestris	Horned Lark	Passeriformes	0.265306	T (OR, WA)	LC	0.06182	1.69344	9	0.00126582	3.65056	0.686889	0.6391	0.34224	0.01866	54.174	38.619	7.207	0.34747	0.24652	0.18441	0.04511	0.13235	0.00986	0.02548	0.00732	0.00148	1	2.54533
Bucephala albeola	Bufflehead	Anseriformes	0.06		LC	0.036267	1.48511	4	0.0106822	2.44204	0.906675	0.42129	0.51789	0.06082	88.321	11.309	0.37	0.37211	0.04763	0.45759	0.00155	0.05839	0.05351	0.00191	0.00707	0.00024	3	2.53144
Leucophaeus atricilla	Laughing Gull	Charadriiformes	0.0816327		LC	0.068216		3			2.27387	0.49322	0.41866	0.08812	84.354	14.923	0.723	0.41696	0.07275	0.35295	0.00351	0.06276	0.07363	0.00295	0.01372	0.00077	1	2.52827
Corvus caurinus	Northwestern Crow	Passeriformes	0.5		LC	0.014906		4			0.37265	0.90423	0.09339	0.00238	24.996	49.764	25.24	0.226	0.4502	0.02331	0.22803	0.04617	0.00065	0.02391	0.00127	0.00046	2	2.52487
Chamaea fasciata	Wrentit	Passeriformes	0		LC	0.024716	1.27235	1		1.94255	2.4716	0.41064	0.48259	0.10677	100	0	0	0.41064	0	0.48259	0	0	0.10677	0	0	0	1	2.49903
Rynchops niger	Black Skimmer	Charadriiformes	0.454545	BCC	LC	0.020843		4			0.521075	0.86808	0.12725	0.00467	29.697	49.398	20.905	0.25762	0.42909	0.03808	0.18137	0.0624	0.00127	0.02677	0.00249	0.00091	2	2.49064
Mergus serrator	Red-breasted Merganser	Anseriformes	0		LC	0.077019		3			2.5673	0.44042	0.44697	0.11261	100	0	0	0.44042	0	0.44697	0	0	0.11261	0	0	0	3	2.45699
Geothlypis formosa	Kentucky Warbler	Passeriformes	0.510638	BCC	LC	0.003227	1.4553	2	0.000221185	0.221741	0.16135	0.93913	0.0604	0.00047	23.914	49.775	26.311	0.22431	0.46798	0.01471	0.24684	0.02953	0.00012	0.01616	0.00024	0.00011	2	2.45616
Setophaga tigrina	Cape May Warbler	Passeriformes	0.0816327		LC	0.01106		5	0.0134884		0.2212	0.50714	0.42193	0.07093	84.354	14.923	0.723	0.42863	0.07481	0.35527	0.0037	0.06364	0.05964	0.00302	0.01078	0.00051	1	2.44687
Dumetella carolinensis	Gray Catbird	Passeriformes	0.122449		LC	0.070682	1.7955	5	3.57565e-05	3.93662	1.41364	0.52941	0.42581	0.04478	77.032	21.384	1.584	0.40834	0.11303	0.32779	0.00804	0.09091	0.03419	0.00711	0.0099	0.00069	1	2.4448
Setophaga discolor	Prairie Warbler	Passeriformes	0.5	BCC	LC	0.004253	0.780723	3	6.51786e-05	0.544751	0.141767	0.93359	0.06581	0.0006	24.996	49.764	25.24	0.23338	0.46481	0.01641	0.2354	0.0325	0.00017	0.0169	0.00033	0.0001	2	2.43919
Setophaga graciae	Grace's Warbler	Passeriformes	0.272727	BCC	LC	0.012245		1			1.2245	0.70452	0.27031	0.02517	53.112	39.275	7.613	0.37384	0.27779	0.14373	0.05289	0.10538	0.01355	0.0212	0.00958	0.00204	1	2.42377
Corvus cryptoleucus	Chihuahuan Raven	Passeriformes	0.111111		LC	0.059059		3			1.96863	0.55132	0.38298	0.0657	79.073	19.595	1.332	0.43639	0.10796	0.30309	0.00697	0.07454	0.05125	0.00535	0.01345	0.001	1	2.42371
Geothlypis trichas	Common Yellowthroat	Passeriformes	0.0816327		LC	0.063603	1.55844	4	7.07516e-05	4.0812	1.59008	0.49547	0.45025	0.05428	84.354	14.923	0.723	0.41875	0.07323	0.37929	0.00349	0.06768	0.0455	0.00328	0.00832	0.00046	1	2.4221
Chordeiles minor	Common Nighthawk	Caprimulgiformes	0.4		LC	0.071785		11			0.652591	0.83542	0.15745	0.00713	36.07	47.81	16.12	0.30148	0.39958	0.0567	0.13436	0.07511	0.00252	0.02564	0.00341	0.0012	2	2.41641
Piranga olivacea	Scarlet Tanager	Passeriformes	0.25		LC	0.045177	1.8198	5	0.0001775	2.48253	0.90354	0.67244	0.3094	0.01816	56.338	37.3	6.362	0.37992	0.25044	0.17308	0.04208	0.11596	0.01038	0.02036	0.0066	0.00118	1	2.41638
Sitta pygmaea	Pygmy Nuthatch	Passeriformes	0.263158		LC	0.022003	2.5389	2		0.866635	1.10015	0.6983	0.28074	0.02096	54.468	38.446	7.086	0.38052	0.26901	0.15254	0.04877	0.10775	0.01162	0.02045	0.0077	0.00164	1	2.39922
Aythya americana	Redhead	Anseriformes	0.24		LC	0.053097		4			1.32742	0.68192	0.28825	0.02983	57.834	36.309	5.857	0.39413	0.24872	0.16683	0.03907	0.10377	0.01738	0.01765	0.0106	0.00185	1	2.39647
Passerculus sandwichensis	Savannah Sparrow	Passeriformes	0.28		LC	0.058326	1.85436	10	7.06316e-05	3.14534	0.58326	0.71234	0.27438	0.01328	52.012	39.989	7.999	0.37146	0.28449	0.14205	0.05639	0.10995	0.00661	0.02238	0.00545	0.00122	1	2.3928
Falco mexicanus	Prairie Falcon	Falconiformes	0.212121		LC	0.02543	0.705704	5	0.00275176	3.60349	0.5086	0.63488	0.34805	0.01707	62.077	33.315	4.608	0.39511	0.21104	0.21532	0.02873	0.11621	0.01034	0.01652	0.0059	0.00083	1	2.39147
Sitta pusilla	Brown-headed Nuthatch	Passeriformes	0.541667	BCC	LC	0		1			0	1	0	0	21.052	49.298	29.65	0.21052	0.49298	0	0.2965	0	0	0	0	0	2	2.38248
Cathartes aura	Turkey Vulture	Accipitriformes	0.0204082		LC	0.04802	0.57618	6	0.00243905	8.3342	0.800333	0.43791	0.49794	0.06415	95.917	4.042	0.041	0.41947	0.01829	0.47844	0.00015	0.01927	0.06126	0.00023	0.00286	3e-05	3	2.38064
Anas platyrhynchos	Mallard	Anseriformes	0.06		LC	0.06518	1.14209	5	0.000578679	5.70707	1.3036	0.48157	0.46609	0.05234	88.321	11.309	0.37	0.4259	0.05392	0.41148	0.00175	0.05294	0.04583	0.00167	0.00623	0.00028	1	2.37891
Melanerpes uropygialis	Gila Woodpecker	Piciformes	0.5		LC	0.006915		4			0.172875	0.95614	0.04341	0.00045	24.996	49.764	25.24	0.23896	0.47627	0.01089	0.24091	0.02111	0.00011	0.01141	0.00026	8e-05	2	2.37669
Hydroprogne caspia	Caspian Tern	Charadriiformes	0.28		LC	0.066973		6			1.11622	0.72837	0.25083	0.0208	52.012	39.989	7.999	0.37882	0.29217	0.13023	0.05738	0.09979	0.01107	0.02081	0.00793	0.0018	1	2.37405
Poecile atricapillus	Black-capped Chickadee	Passeriformes	0.0952381		LC	0.068086	3.05212	4		2.23078	1.70215	0.5343	0.41347	0.05223	81.875	17.148	0.977	0.43797	0.09122	0.33832	0.00511	0.0711	0.04246	0.00405	0.00916	0.00061	1	2.37319
Empidonax alnorum	Alder Flycatcher	Passeriformes	0.162791		LC	0.048858		3			1.6286	0.61897	0.33643	0.0446	70.041	27.209	2.75	0.43371	0.1688	0.23571	0.01646	0.09101	0.03099	0.00971	0.01228	0.00133	1	2.36345
Anas strepera	Gadwall	Anseriformes	0.04		LC	0.041323	3.10412	2	0.000166003	1.33123	2.06615	0.49294	0.43333	0.07373	92.119	7.724	0.157	0.45478	0.0373	0.39907	0.00086	0.03368	0.06734	0.00058	0.00626	0.00013	1	2.35778
Podiceps auritus	Horned Grebe	Podicipediformes	0.3		LC	0.030002		3			1.00007	0.7545	0.22885	0.01665	49.156	41.652	9.192	0.37087	0.31509	0.11235	0.06854	0.09482	0.00834	0.02168	0.00661	0.0017	1	2.35634
Setophaga citrina	Hooded Warbler	Passeriformes	0.395833		LC	0.009171	1.70766	2	0.000208753	0.537051	0.45855	0.8509	0.14524	0.00386	36.558	47.677	15.765	0.31106	0.40589	0.05306	0.13395	0.06905	0.00146	0.02313	0.00183	0.00057	2	2.35351
Egretta tricolor	Tricolored Heron	Pelecaniformes	0.255319		LC	0.034803		3			1.1601	0.71866	0.2588	0.02254	55.617	37.729	6.654	0.39969	0.27188	0.14378	0.04709	0.09723	0.0127	0.01779	0.00818	0.00166	1	2.33041
Mniotilta varia	Black-and-white Warbler	Passeriformes	0.22449		LC	0.0359	1.57865	4	0.000310023	2.27409	0.8975	0.67772	0.305	0.01728	60.19	34.657	5.153	0.40914	0.23451	0.18238	0.03407	0.10612	0.01038	0.0165	0.00594	0.00096	1	2.32612
Antrostomus carolinensis	Chuck-will's-widow	Caprimulgiformes	0.421053		LC	0.026005		6			0.433417	0.88908	0.10775	0.00317	33.575	48.559	17.866	0.29855	0.4319	0.03608	0.15863	0.05221	0.00112	0.01946	0.00148	0.00057	2	2.32607
Gallinago delicata	Wilson's Snipe	Charadriiformes	0.24		LC	0.035386	1.03466	7	0.000939243	3.42007	0.505514	0.69231	0.29417	0.01352	57.834	36.309	5.857	0.40174	0.25057	0.16903	0.04	0.10741	0.00757	0.01773	0.00511	0.00084	1	2.32499
Picoides dorsalis	American Three-toed Woodpecker	Piciformes	0.44		LC	0.006936		2			0.3468	0.91068	0.08731	0.00201	31.321	49.107	19.572	0.28535	0.44731	0.02719	0.17802	0.04276	0.00067	0.01736	0.001	0.00034	2	2.32402
Anas fulvigula	Mottled Duck	Anseriformes	0.227273		LC	0.050922		4			1.27305	0.69412	0.27845	0.02743	59.744	34.974	5.282	0.41459	0.24361	0.16654	0.03592	0.0966	0.01631	0.01531	0.00953	0.00159	1	2.32369
Charadrius vociferus	Killdeer	Charadriiformes	0.06		LC	0.081011		4			2.02528	0.54078	0.38964	0.06958	88.321	11.309	0.37	0.47837	0.06043	0.3439	0.00198	0.04444	0.06094	0.0013	0.00822	0.00042	1	2.30533
Geococcyx californianus	Greater Roadrunner	Cuculiformes	0.0833333		LC	0.057136		3			1.90453	0.56374	0.37482	0.06144	84.032	15.209	0.759	0.47443	0.08528	0.31475	0.00403	0.05712	0.05114	0.00295	0.00969	0.00061	1	2.30146
Chaetura vauxi	Vaux's Swift	Apodiformes	0.230769		LC	0.019833	1.3833	2		1.43375	0.99165	0.69996	0.28233	0.01771	59.203	35.342	5.455	0.41506	0.24757	0.1665	0.03733	0.09972	0.01047	0.01611	0.00613	0.00111	1	2.29224
Chaetura pelagica	Chimney Swift	Apodiformes	0.26087		NT	0.041795		4	0.000202214		1.04487	0.73811	0.24369	0.0182	54.804	38.241	6.955	0.40444	0.28296	0.13332	0.05071	0.09293	0.01028	0.01744	0.00652	0.0014	1	2.28633
Vermivora chrysoptera	Golden-winged Warbler	Passeriformes	0.458333	BCC	NT	0.015071		7			0.2153	0.945	0.05426	0.00074	29.3	49.457	21.243	0.27676	0.46762	0.01599	0.20062	0.02658	0.00025	0.01169	0.00037	0.00012	2	2.28272
Protonotaria citrea	Prothonotary Warbler	Passeriformes	0.5	BCC	LC	0.0003	3.02427	2	8.62476e-05	0.00991975	0.015	0.99246	0.00753	1e-05	24.996	49.764	25.24	0.24788	0.49384	0.00208	0.25074	0.0038	0	0.00165	0	1e-05	2	2.2754
Setophaga pensylvanica	Chestnut-sided Warbler	Passeriformes	0.204082		LC	0.050726		4	0.000265734		1.26815	0.68783	0.28501	0.02716	63.369	32.385	4.246	0.43548	0.22377	0.18104	0.02858	0.09137	0.01717	0.0126	0.00871	0.00128	1	2.26973
Tyrannus verticalis	Western Kingbird	Passeriformes	0.0204082		LC	0.072549	0.996322	7		7.28168	1.03641	0.48249	0.46072	0.05679	95.917	4.042	0.041	0.46234	0.01998	0.4426	0.00017	0.01791	0.05423	0.00021	0.00253	3e-05	1	2.26769
Contopus virens	Eastern Wood-Pewee	Passeriformes	0.23913		LC	0.03282		3	5.79722e-05		1.094	0.73119	0.24862	0.02019	57.968	36.209	5.823	0.424	0.26526	0.14382	0.04193	0.08979	0.01186	0.01501	0.00704	0.00129	1	2.24681
Ardea alba	Great Egret	Pelecaniformes	0.4		LC	0.019789		5			0.39578	0.89848	0.09881	0.00271	36.07	47.81	16.12	0.32437	0.42949	0.03531	0.14462	0.04732	0.00102	0.01618	0.00129	0.0004	2	2.23766
Poecile hudsonicus	Boreal Chickadee	Passeriformes	0.192308		LC	0.022575	2.03795	2		1.10773	1.12875	0.68273	0.29502	0.02225	65.235	30.983	3.782	0.44562	0.21191	0.19221	0.0252	0.09116	0.01452	0.01165	0.00676	0.00097	1	2.23415
Vireo flavifrons	Yellow-throated Vireo	Passeriformes	0.25		LC	0.019233	0.891	3	0.000158315	2.15859	0.6411	0.73923	0.25061	0.01016	56.338	37.3	6.362	0.41702	0.27575	0.14076	0.04646	0.09341	0.0056	0.01644	0.00384	0.00072	1	2.22957
Bombycilla cedrorum	Cedar Waxwing	Passeriformes	0.0204082		LC	0.068499	1.32011	5	0.000123176	5.1889	1.36998	0.4963	0.45302	0.05068	95.917	4.042	0.041	0.47626	0.01983	0.43449	0.00021	0.01835	0.04842	0.00018	0.00224	2e-05	1	2.22186
Petrochelidon pyrrhonota	American Cliff Swallow	Passeriformes	0.142857		LC	0.065067	1.57464	8	6.18605e-05	4.13218	0.813338	0.62805	0.34807	0.02388	73.535	24.316	2.149	0.46255	0.15244	0.2555	0.01306	0.08472	0.0173	0.00785	0.006	0.00058	1	2.22174
Melospiza melodia	Song Sparrow	Passeriformes	0.0612245		LC	0.073808	1.38672	7	7.64912e-06	5.32249	1.0544	0.5446	0.4162	0.0392	88.096	11.516	0.388	0.48047	0.06206	0.36637	0.00207	0.04825	0.03412	0.00158	0.00485	0.00023	1	2.20988
Nyctanassa violacea	Yellow-crowned Night-Heron	Pelecaniformes	0.468085		LC	0.002753		4			0.068825	0.98242	0.01755	3e-05	28.243	49.595	22.162	0.27755	0.48721	0.00487	0.21766	0.00873	1e-05	0.00395	1e-05	1e-05	2	2.20875
Zenaida macroura	Mourning Dove	Columbiformes	0.06		LC	0.060751	1.35337	5	0.000112097	4.48885	1.21502	0.54372	0.41692	0.03936	88.321	11.309	0.37	0.48049	0.06126	0.36811	0.00197	0.0473	0.03461	0.00151	0.00453	0.00022	1	2.20817
Setophaga petechia	American Yellow Warbler	Passeriformes	0.142857		LC	0.047549	1.44544	5	0.000104904	3.28958	0.95098	0.6336	0.34324	0.02316	73.535	24.316	2.149	0.46624	0.15417	0.25238	0.01319	0.08317	0.01673	0.00769	0.00582	0.00061	1	2.20659
Setophaga magnolia	Magnolia Warbler	Passeriformes	0.0816327		LC	0.055229		4	0.00389566		1.38072	0.57266	0.38961	0.03773	84.354	14.923	0.723	0.48391	0.08476	0.32792	0.00399	0.05887	0.03171	0.00282	0.0056	0.00042	1	2.20608
Empidonax virescens	Acadian Flycatcher	Passeriformes	0.375		LC	0.012052	1.13523	6	6.26891e-05	1.06164	0.200867	0.89303	0.10549	0.00148	39.105	46.686	14.209	0.34974	0.41655	0.04068	0.12674	0.04967	0.00063	0.01514	0.00064	0.00021	2	2.17696
Icterus spurius	Orchard Oriole	Passeriformes	0.163265		LC	0.032359	1.92288	3		1.68284	1.07863	0.6716	0.30696	0.02144	69.943	27.286	2.771	0.46966	0.18384	0.2149	0.0181	0.08312	0.01487	0.00894	0.0059	0.00067	1	2.17507
Egretta caerulea	Little Blue Heron	Pelecaniformes	0.428571		LC	0.005496		3			0.1832	0.95362	0.04586	0.00052	32.728	48.747	18.525	0.31229	0.46504	0.01479	0.17629	0.0222	0.0002	0.00887	0.00023	9e-05	2	2.16884
Anas discors	Blue-winged Teal	Anseriformes	0.18		LC	0.074361		6			1.23935	0.70138	0.27296	0.02566	67.204	29.47	3.326	0.47123	0.20755	0.18355	0.0226	0.07969	0.01726	0.00972	0.00746	0.00094	1	2.16557
Sturnella neglecta	Western Meadowlark	Passeriformes	0.125		LC	0.050548	1.83878	5	0.000374523	2.749	1.01096	0.6356	0.34167	0.02273	76.608	21.746	1.646	0.48717	0.13826	0.26178	0.01017	0.07404	0.01713	0.00585	0.00516	0.00044	1	2.14888
Himantopus mexicanus	Black-necked Stilt	Charadriiformes	0.270833	E (HI)	LC	0.040206		5			0.80412	0.79962	0.18938	0.011	53.378	39.094	7.528	0.42696	0.3132	0.10095	0.05946	0.07356	0.00587	0.01487	0.00418	0.00095	1	2.14315
Haemorhous cassinii	Cassin's Finch	Passeriformes	0.210526		NT	0.016853	1.25568	2		1.34214	0.84265	0.73489	0.25186	0.01325	62.317	33.148	4.535	0.45859	0.2439	0.15636	0.0324	0.0832	0.00822	0.0123	0.00438	0.00065	1	2.13738
Ammodramus bairdii	Baird's Sparrow	Passeriformes	0.391304	BCC	LC	0.005804		2			0.2902	0.92547	0.07309	0.00144	37.115	47.475	15.41	0.34344	0.43987	0.02706	0.14216	0.03429	0.00065	0.01174	0.00059	0.0002	2	2.13705
Riparia riparia	Bank Swallow	Passeriformes	0.22449		LC	0.068898		7	9.8051e-05		0.984257	0.75504	0.22894	0.01602	60.19	34.657	5.153	0.45467	0.26217	0.13754	0.0382	0.07901	0.00969	0.01239	0.00539	0.00094	1	2.13593
Dendrocygna bicolor	Fulvous Whistling-Duck	Anseriformes	0.047619		LC	0.054146		3			1.80487	0.58363	0.36132	0.05505	90.682	9.091	0.227	0.53028	0.052	0.32698	0.00135	0.03357	0.04956	0.00077	0.00534	0.00015	1	2.13529
Catherpes mexicanus	Canyon Wren	Passeriformes	0.0625		LC	0.03452		2			1.726	0.59979	0.34987	0.05034	87.843	11.755	0.402	0.52777	0.0697	0.30693	0.00232	0.04156	0.04373	0.00138	0.00629	0.00032	1	2.13028
Colaptes auratus	Northern Flicker	Piciformes	0.22449		LC	0.038517	2.45254	6	0.0005735	1.57049	0.64195	0.75147	0.23982	0.00871	60.19	34.657	5.153	0.45254	0.2609	0.14425	0.03803	0.0826	0.00511	0.01297	0.00307	0.00053	1	2.12299
Tringa flavipes	Lesser Yellowlegs	Charadriiformes	0.18	BCC	LC	0.058561		5			1.17122	0.71639	0.26062	0.02299	67.204	29.47	3.326	0.4814	0.21189	0.17525	0.0231	0.07606	0.01539	0.00931	0.00675	0.00085	1	2.12279
Anthus spragueii	Sprague's Pipit	Passeriformes	0.3125	BCC	VU	0.017051		3			0.568367	0.85622	0.13824	0.00554	47.452	42.609	9.939	0.40605	0.3656	0.0659	0.08457	0.05822	0.00257	0.01412	0.00227	0.0007	1	2.10305
Tyrannus couchii	Couch's Kingbird	Passeriformes	0		LC	0.118643		6			1.97738	0.54983	0.38388	0.06629	100	0	0	0.54983	0	0.38388	0	0	0.06629	0	0	0	1	2.09921
Setophaga castanea	Bay-breasted Warbler	Passeriformes	0.122449	BCC	LC	0.041739		3			1.3913	0.66883	0.29881	0.03236	77.032	21.384	1.584	0.51566	0.14307	0.22996	0.0101	0.06367	0.0247	0.00518	0.0071	0.00056	1	2.09673
Columba livia	Rock Pigeon	Columbiformes	0		LC	0.076477		4	0.000739927		1.91193	0.54545	0.39253	0.06202	100	0	0	0.54545	0	0.39253	0	0	0.06202	0	0	0	1	2.09516
Hirundo rustica	Barn Swallow	Passeriformes	0.08		LC	0.065459	1.30928	9	6.51423e-05	4.9996	0.727322	0.61109	0.36143	0.02748	84.633	14.67	0.697	0.51762	0.0892	0.30572	0.00427	0.05326	0.02299	0.00245	0.00424	0.00025	1	2.08782
Picoides arcticus	Black-backed Woodpecker	Piciformes	0.357143		LC	0.007063		2			0.35315	0.90907	0.08881	0.00212	41.401	45.643	12.956	0.37662	0.415	0.03639	0.11745	0.04054	0.001	0.01188	0.00089	0.00023	2	2.08664
Tyrannus forficatus	Scissor-tailed Flycatcher	Passeriformes	0.102041		LC	0.101594		7			1.45134	0.65658	0.30818	0.03524	80.662	18.219	1.119	0.52995	0.11948	0.24834	0.00715	0.05626	0.02833	0.00358	0.00645	0.00046	1	2.07461
Spizella pallida	Clay-colored Sparrow	Passeriformes	0		LC	0.060149	1.1846	5		5.07756	1.20298	0.52887	0.42834	0.04279	100	0	0	0.52887	0	0.42834	0	0	0.04279	0	0	0	1	2.07063
Phalacrocorax pelagicus	Pelagic Cormorant	Suliformes	0.2		LC	0.019972		2			0.9986	0.75478	0.22861	0.01661	63.99	31.927	4.083	0.48306	0.24152	0.14624	0.0302	0.07249	0.0106	0.00988	0.00526	0.00075	1	2.06966
Rallus longirostris	Clapper Rail	Gruiformes	0.37037	E (AZ, CA)	LC	0.007487		3			0.249567	0.93577	0.0632	0.00103	39.674	46.459	13.867	0.37141	0.43488	0.0248	0.12948	0.02933	0.00053	0.00907	0.00038	0.00012	2	2.05093
Setophaga americana	Northern Parula	Passeriformes	0.25		LC	0.014667		2	0.000101316		0.73335	0.81316	0.17765	0.00919	56.338	37.3	6.362	0.45822	0.30376	0.09996	0.05118	0.06588	0.0052	0.01181	0.00336	0.00063	1	2.04616
Alectoris chukar	Chukar	Galliformes	0		LC	0.030569	3.13875	2	0.00283832	0.973923	1.52845	0.54193	0.41542	0.04265	100	0	0	0.54193	0	0.41542	0	0	0.04265	0	0	0	1	2.04409
Sitta carolinensis	White-breasted Nuthatch	Passeriformes	0.0833333		LC	0.038803	3.2508	3	1.819e-05	1.19364	1.29343	0.64559	0.3251	0.02931	84.032	15.209	0.759	0.54325	0.09755	0.2726	0.00479	0.05004	0.02447	0.00246	0.0045	0.00034	1	2.02861
Oreothlypis virginiae	Virginia's Warbler	Passeriformes	0.24	BCC	LC	0.011789	1.18184	2		0.997511	0.58945	0.80633	0.18704	0.00663	57.834	36.309	5.857	0.46679	0.29279	0.10786	0.04675	0.06788	0.00369	0.0113	0.00242	0.00052	1	2.02763
Oreoscoptes montanus	Sage Thrasher	Passeriformes	0.184211		LC	0.016212	1.4175	2		1.1437	0.8106	0.74962	0.23815	0.01223	66.511	30.024	3.465	0.49939	0.22484	0.15775	0.02539	0.07162	0.00797	0.00878	0.00378	0.00048	1	2.02582
Contopus cooperi	Olive-sided Flycatcher	Passeriformes	0.367347	BCC	NT	0.013313		6			0.221883	0.94316	0.05606	0.00078	40.06	46.286	13.654	0.37768	0.43694	0.02251	0.12854	0.02564	0.00041	0.00791	0.00028	9e-05	2	2.02233
Pica nuttalli	Yellow-billed Magpie	Passeriformes	0	BCC	LC	0.055356		3			1.8452	0.57589	0.36659	0.05752	100	0	0	0.57589	0	0.36659	0	0	0.05752	0	0	0	1	2.02078
Passer montanus	Eurasian Tree Sparrow	Passeriformes	0		LC	0.091778		5			1.83556	0.57805	0.36492	0.05703	100	0	0	0.57805	0	0.36492	0	0	0.05703	0	0	0	1	2.01499
Regulus satrapa	Golden-crowned Kinglet	Passeriformes	0.163265		LC	0.018364	3	2	0.000425107	0.612133	0.9182	0.736	0.24958	0.01442	69.943	27.286	2.771	0.51472	0.20125	0.17477	0.02003	0.06759	0.00994	0.00722	0.00402	0.00046	1	2.00608
Spinus tristis	American Goldfinch	Passeriformes	0.0204082		LC	0.071644	1.9764	6	4.62372e-05	3.62497	1.19407	0.57806	0.38846	0.03348	95.917	4.042	0.041	0.55424	0.02355	0.37298	0.00027	0.01535	0.03195	0.00013	0.00152	1e-05	1	2.00297
Pipilo erythrophthalmus	Eastern Towhee	Passeriformes	0.325581		LC	0.014225		4	5.87194e-06		0.355625	0.90805	0.0898	0.00215	45.665	43.561	10.774	0.41463	0.39581	0.04091	0.09761	0.03898	0.00111	0.00991	0.00082	0.00022	1	1.99889
Turdus migratorius	American Robin	Passeriformes	0.0408163		LC	0.070933	1.84464	7	1.59692e-05	3.84536	1.01333	0.60334	0.36859	0.02807	91.951	7.884	0.165	0.5549	0.04738	0.33894	0.00106	0.0291	0.02567	0.00055	0.00236	4e-05	1	1.99333
Columbina inca	Inca Dove	Columbiformes	0		LC	0.035612		2			1.7806	0.58855	0.35796	0.05349	100	0	0	0.58855	0	0.35796	0	0	0.05349	0	0	0	1	1.98337
Lophodytes cucullatus	Hooded Merganser	Anseriformes	0.14		LC	0.067369		6			1.12282	0.72684	0.25207	0.02109	74.033	23.9	2.067	0.53835	0.17402	0.18658	0.01447	0.05979	0.0154	0.0057	0.00519	0.0005	1	1.98128
Gallinula galeata	Common Gallinule	Gruiformes	0.375	E (HI)	LC	0.007406		6			0.123433	0.96881	0.031	0.00019	39.105	46.686	14.209	0.37909	0.45224	0.01187	0.13748	0.01454	9e-05	0.00459	8e-05	2e-05	2	1.97529
Aythya collaris	Ring-necked Duck	Anseriformes	0.02		LC	0.029469	2.00125	2	0.000155784	1.47253	1.47345	0.59807	0.36425	0.03768	95.994	3.967	0.039	0.57442	0.02337	0.34951	0.00028	0.01464	0.03601	0.0001	0.00166	1e-05	1	1.97414
Elanus leucurus	White-tailed Kite	Accipitriformes	0.0810811		LC	0.095454		7			1.36363	0.67427	0.29442	0.03131	84.441	14.846	0.713	0.5701	0.09953	0.24792	0.00464	0.04435	0.02639	0.00215	0.00458	0.00034	1	1.96632
Quiscalus quiscula	Common Grackle	Passeriformes	0.0204082		LC	0.09854		6	1.08941e-05		1.64233	0.61589	0.33879	0.04532	95.917	4.042	0.041	0.59117	0.0244	0.32481	0.00032	0.0139	0.04319	8e-05	0.00212	1e-05	1	1.96193
Icterus parisorum	Scott's Oriole	Passeriformes	0.12		LC	0.023485		2			1.17425	0.71568	0.26123	0.02309	77.431	21.034	1.535	0.5542	0.15093	0.20248	0.01055	0.05432	0.01763	0.00443	0.00509	0.00037	1	1.95814
Buteo lineatus	Red-shouldered Hawk	Accipitriformes	0.340426		LC	0.008249		4			0.206225	0.94736	0.05196	0.00068	43.666	44.55	11.784	0.41362	0.42228	0.02266	0.11146	0.023	0.00038	0.0063	0.00022	8e-05	2	1.93586
Loxia curvirostra	Red Crossbill	Passeriformes	0.204082		LC	0.014888		2			0.7444	0.81386	0.17675	0.00939	63.369	32.385	4.246	0.5158	0.26412	0.11205	0.03394	0.05664	0.00584	0.00806	0.00309	0.00046	1	1.91947
Cinclus mexicanus	American Dipper	Passeriformes	0.25		LC	0.00793	0.94815	2		0.836366	0.3965	0.85858	0.13819	0.00323	56.338	37.3	6.362	0.48399	0.32029	0.07759	0.0543	0.05155	0.0018	0.00905	0.00116	0.00027	1	1.91815
Vireo olivaceus	Red-eyed Vireo	Passeriformes	0.0612245		LC	0.04132	1.44817	5	0.000557174	2.85325	0.8264	0.66201	0.32025	0.01774	88.096	11.516	0.388	0.58368	0.07573	0.28179	0.0026	0.03729	0.01549	0.00117	0.00214	0.00011	1	1.8966
Passerina cyanea	Indigo Bunting	Passeriformes	0.102041		LC	0.026729	1.58722	3	1.07812e-05	1.68401	0.890967	0.71073	0.27402	0.01525	80.662	18.219	1.119	0.57306	0.12976	0.22144	0.00791	0.04954	0.01212	0.00304	0.00289	0.00024	1	1.89552
Calamospiza melanocorys	Lark Bunting	Passeriformes	0.108696		LC	0.033562		3			1.11873	0.72767	0.2514	0.02093	79.459	19.271	1.27	0.57841	0.14034	0.19963	0.00892	0.04828	0.01655	0.00349	0.00409	0.00029	1	1.89412
Vireo gilvus	Warbling Vireo	Passeriformes	0.0816327		LC	0.036135	1.76715	4	7.34266e-05	2.04482	0.903375	0.69229	0.29115	0.01656	84.354	14.923	0.723	0.58392	0.10342	0.24577	0.00495	0.04331	0.01385	0.00207	0.0025	0.00021	1	1.8839
Spinus psaltria	Lesser Goldfinch	Passeriformes	0.0384615		LC	0.028489		2			1.42445	0.66184	0.3041	0.03406	92.404	7.454	0.142	0.61222	0.04868	0.28053	0.00094	0.02315	0.03129	0.00042	0.00271	6e-05	1	1.88358
Euphagus carolinus	Rusty Blackbird	Passeriformes	0.367347	BCC	VU	0		2			0	1	0	0	40.06	46.286	13.654	0.4006	0.46286	0	0.13654	0	0	0	0	0	2	1.87248
Megaceryle alcyon	Belted Kingfisher	Coraciiformes	0.1		LC	0.044305		4	0.000117081		1.10762	0.72662	0.25279	0.02059	81.031	17.893	1.076	0.58917	0.12981	0.20459	0.00764	0.04534	0.01655	0.00286	0.00378	0.00026	1	1.87172
Oxyura jamaicensis	Ruddy Duck	Anseriformes	0.08		LC	0.058379		5			1.16758	0.71691	0.26021	0.02288	84.633	14.67	0.697	0.60741	0.10466	0.21967	0.00484	0.03866	0.01925	0.00188	0.00338	0.00025	1	1.84635
Spizella passerina	Chipping Sparrow	Passeriformes	0.0612245		LC	0.056663	2.08387	7	8.85839e-06	2.71912	0.809471	0.68534	0.298	0.01666	88.096	11.516	0.388	0.60415	0.07852	0.26235	0.00267	0.03455	0.01446	0.0011	0.00209	0.00011	1	1.84384
Calypte costae	Costa's Hummingbird	Apodiformes	0.166667	BCC	LC	0.046708		6			0.778467	0.80557	0.18415	0.01028	69.387	27.724	2.889	0.5589	0.22379	0.12797	0.02288	0.05047	0.007	0.00571	0.00298	0.0003	1	1.84277
Butorides virescens	Green Heron	Pelecaniformes	0.14		LC	0.026918		3			0.897267	0.77825	0.20824	0.01351	74.033	23.9	2.067	0.57637	0.1862	0.15414	0.01568	0.04945	0.00982	0.00465	0.00335	0.00034	1	1.84249
Empidonax flaviventris	Yellow-bellied Flycatcher	Passeriformes	0.0434783		LC	0.017245	1.51508	6	0.00617898	1.13822	0.287417	0.67091	0.31238	0.01671	91.428	8.381	0.191	0.61371	0.05587	0.28546	0.00133	0.02637	0.01511	0.00055	0.00157	3e-05	1	1.82634
Tyrannus vociferans	Cassin's Kingbird	Passeriformes	0.0833333		LC	0.024995	0.658665	6		3.7948	0.416583	0.71988	0.2664	0.01372	84.032	15.209	0.759	0.60534	0.1091	0.22358	0.00544	0.04075	0.0114	0.00207	0.00224	8e-05	1	1.82132
Sayornis nigricans	Black Phoebe	Passeriformes	0.0666667		LC	0.042465	2.01746	5		2.10487	0.8493	0.70269	0.28203	0.01528	87.083	12.446	0.471	0.61221	0.08714	0.24554	0.00334	0.03524	0.01308	0.00125	0.00208	0.00012	1	1.81762
Megascops asio	Eastern Screech-Owl	Strigiformes	0.097561		LC	0.051604		5			1.03208	0.74697	0.2353	0.01773	81.454	17.513	1.033	0.60868	0.13074	0.19154	0.00755	0.04121	0.01432	0.00255	0.00318	0.00023	1	1.81231
Dryocopus pileatus	Pileated Woodpecker	Piciformes	0.227273		LC	0.015235	1.28843	6		1.18245	0.253917	0.87637	0.12151	0.00212	59.744	34.974	5.282	0.52416	0.30625	0.07201	0.04596	0.04278	0.00127	0.00672	0.00071	0.00014	1	1.81203
Phalaenoptilus nuttallii	Common Poorwill	Caprimulgiformes	0.1		LC	0.05038		5	8.62884e-05		1.0076	0.7501	0.23289	0.01701	81.031	17.893	1.076	0.60802	0.13414	0.18866	0.00794	0.04163	0.01363	0.0026	0.00316	0.00022	1	1.80943
Sialia mexicana	Western Bluebird	Passeriformes	0.125		LC	0.023272	2.95418	3		0.787766	0.775733	0.7726	0.21676	0.01064	76.608	21.746	1.646	0.59208	0.16795	0.16609	0.01257	0.047	0.00791	0.00367	0.00251	0.00022	1	1.80674
Falco columbarius	Merlin	Falconiformes	0.16		LC	0.016327	1.72125	8	0.00278195	0.948555	0.204088	0.80567	0.18995	0.00438	70.567	26.774	2.659	0.56881	0.21554	0.13376	0.02132	0.05109	0.0031	0.0051	0.00111	0.00017	1	1.80661
Molothrus ater	Brown-headed Cowbird	Passeriformes	0.0408163		LC	0.06345	4.32	6	1.21634e-05	1.46875	1.0575	0.68346	0.29635	0.02019	91.951	7.884	0.165	0.62866	0.05365	0.27254	0.00115	0.02335	0.01831	0.00046	0.00184	4e-05	1	1.80309
Elanoides forficatus	Swallow-tailed Kite	Accipitriformes	0.341463	BCC	LC	0		1			0	1	0	0	43.509	44.624	11.867	0.43509	0.44624	0	0.11867	0	0	0	0	0	3	1.80225
Haemorhous purpureus	Purple Finch	Passeriformes	0.125		LC	0.042918		5	0.000321012		0.85836	0.7772	0.21038	0.01242	76.608	21.746	1.646	0.59573	0.16884	0.16107	0.01263	0.04575	0.00928	0.00356	0.00287	0.00027	1	1.80188
Euphagus cyanocephalus	Brewer's Blackbird	Passeriformes	0.0416667		LC	0.033194	1.29518	4	0.000243669	2.56289	0.82985	0.68089	0.30248	0.01663	91.775	8.052	0.173	0.62489	0.05476	0.27779	0.00124	0.02424	0.01507	0.00045	0.00152	4e-05	1	1.80003
Troglodytes aedon	House Wren	Passeriformes	0.0208333		LC	0.084754	4.18275	8	3.87597e-05	2.02627	1.05943	0.66135	0.31707	0.02158	95.831	4.127	0.042	0.63365	0.0274	0.30421	0.0003	0.01275	0.02045	0.00011	0.00112	1e-05	1	1.79855
Icteria virens	Yellow-breasted Chat	Passeriformes	0.270833		LC	0.00478	0.627642	5	0.000198613	0.761581	0.0956	0.92905	0.07039	0.00056	53.378	39.094	7.528	0.49562	0.36356	0.03787	0.06987	0.02716	0.00029	0.00536	0.00022	5e-05	1	1.7931
Columbina passerina	Common Ground-Dove	Columbiformes	0.105263		LC	0.035256	2.259	5		1.56069	0.70512	0.75598	0.23388	0.01014	80.053	18.759	1.188	0.60521	0.14174	0.18737	0.00903	0.04383	0.00795	0.00268	0.00202	0.00017	1	1.79022
Caracara cheriway	Crested Caracara	Falconiformes	0.0869565	T (FL)	LC	0.061238		6			1.02063	0.74959	0.233	0.01741	83.343	15.832	0.825	0.62487	0.11869	0.19416	0.00603	0.03684	0.0144	0.002	0.00279	0.00022	1	1.77775
Actitis macularius	Spotted Sandpiper	Charadriiformes	0.18		LC	0.028939		5	0.000263348		0.57878	0.84439	0.14986	0.00575	67.204	29.47	3.326	0.56736	0.24924	0.10099	0.02779	0.04366	0.00369	0.00521	0.0018	0.00026	1	1.77362
Picoides pubescens	Downy Woodpecker	Piciformes	0.0408163		LC	0.03537	1.67749	4	3.32874e-05	2.10851	0.88425	0.69431	0.2894	0.01629	91.951	7.884	0.165	0.63831	0.05482	0.26645	0.00118	0.02252	0.01475	0.00043	0.0015	4e-05	1	1.76849
Sayornis phoebe	Eastern Phoebe	Passeriformes	0.0204082		LC	0.043019	2.9862	4	1.01883e-05	1.44059	1.07547	0.68129	0.29791	0.0208	95.917	4.042	0.041	0.65329	0.0277	0.28616	0.0003	0.01165	0.01972	0.0001	0.00107	1e-05	1	1.75429
Junco hyemalis	Dark-eyed Junco	Passeriformes	0.163265		LC	0.019251	2.12405	4	5.16432e-05	0.906333	0.481275	0.83418	0.1612	0.00462	69.943	27.286	2.771	0.58347	0.22775	0.11283	0.02296	0.04377	0.00313	0.0046	0.00134	0.00015	1	1.7512
Melanerpes formicivorus	Acorn Woodpecker	Piciformes	0.142857		LC	0.024449	1.8227	5		1.34136	0.48898	0.81427	0.18038	0.00535	73.535	24.316	2.149	0.59869	0.19833	0.13283	0.01725	0.04345	0.00383	0.0041	0.00138	0.00014	1	1.74407
Loxia leucoptera	White-winged Crossbill	Passeriformes	0.0652174		LC	0.020817		2			1.04085	0.74483	0.23712	0.01805	87.343	12.208	0.449	0.65119	0.09041	0.20675	0.00323	0.02924	0.01549	0.00113	0.00243	0.00013	1	1.73284
Haemorhous mexicanus	House Finch	Passeriformes	0.02		LC	0.043088	1.77804	5	2.38314e-05	2.42334	0.86176	0.68697	0.29626	0.01677	95.994	3.967	0.039	0.65929	0.02739	0.28473	0.00029	0.01144	0.01592	9e-05	0.00084	1e-05	1	1.72958
Zonotrichia albicollis	White-throated Sparrow	Passeriformes	0.0408163		LC	0.034603	1.29413	5	3.07187e-05	2.67384	0.69206	0.71045	0.27608	0.01347	91.951	7.884	0.165	0.65338	0.05587	0.25386	0.0012	0.02181	0.01227	0.00041	0.00116	4e-05	1	1.72668
Contopus sordidulus	Western Wood-Pewee	Passeriformes	0.0357143		LC	0.01994	0.699825	3	2.79887e-05	2.84928	0.664667	0.70895	0.27761	0.01344	92.958	6.922	0.12	0.65918	0.04891	0.25798	0.00086	0.01933	0.01242	0.0003	0.00098	4e-05	1	1.71585
Progne subis	Purple Martin	Passeriformes	0.244898		LC	0.014469		8	0.00048099		0.180862	0.93603	0.06339	0.00058	57.122	36.767	6.111	0.53448	0.34443	0.03638	0.05712	0.02305	0.00036	0.00396	0.00019	3e-05	1	1.70788
Sitta canadensis	Red-breasted Nuthatch	Passeriformes	0.163265		LC	0.01653	2.04102	4	8.73494e-05	0.809889	0.41325	0.85326	0.14333	0.00341	69.943	27.286	2.771	0.59704	0.23275	0.10008	0.02347	0.03914	0.00231	0.00411	0.00097	0.00013	1	1.70392
Quiscalus mexicanus	Great-tailed Grackle	Passeriformes	0		LC	0.102536		8			1.2817	0.69213	0.28009	0.02778	100	0	0	0.69213	0	0.28009	0	0	0.02778	0	0	0	1	1.69908
Larus occidentalis	Western Gull	Charadriiformes	0		LC	0.0384		3			1.28	0.69256	0.27975	0.02769	100	0	0	0.69256	0	0.27975	0	0	0.02769	0	0	0	1	1.69795
Auriparus flaviceps	Verdin	Passeriformes	0.142857		LC	0.019295		3			0.643167	0.83778	0.15529	0.00693	73.535	24.316	2.149	0.61602	0.20391	0.11443	0.01785	0.03739	0.0049	0.00347	0.00186	0.00017	1	1.69558
Myiarchus crinitus	Great Crested Flycatcher	Passeriformes	0.152174		LC	0.029156		5			0.58312	0.85245	0.14179	0.00576	71.932	25.664	2.404	0.6131	0.21896	0.10235	0.02039	0.03598	0.00387	0.00346	0.0017	0.00019	1	1.68228
Amphispiza bilineata	Black-throated Sparrow	Passeriformes	0.0333333		LC	0.015354	0.764426	2		2.00857	0.7677	0.72319	0.26405	0.01276	93.406	6.491	0.103	0.67551	0.04689	0.24684	0.00079	0.01701	0.01171	0.0002	0.00101	4e-05	1	1.67812
Oreothlypis ruficapilla	Nashville Warbler	Passeriformes	0.0612245		LC	0.019083		2	9.04786e-05		0.95415	0.76244	0.2224	0.01516	88.096	11.516	0.388	0.67208	0.08743	0.19575	0.00293	0.02581	0.01313	0.00084	0.00192	0.00011	1	1.67597
Corvus corax	Common Raven	Passeriformes	0.177778		LC	0.025916		6			0.431933	0.88931	0.10752	0.00317	67.55	29.205	3.245	0.60098	0.25976	0.07243	0.02857	0.03133	0.00209	0.00376	0.00096	0.00012	1	1.65634
Cyanocitta cristata	Blue Jay	Passeriformes	0.0208333		LC	0.031019	1.0998	5	6.35965e-05	2.82042	0.62038	0.71839	0.26922	0.01239	95.831	4.127	0.042	0.68827	0.0298	0.25835	0.00032	0.01078	0.01169	9e-05	0.00069	1e-05	1	1.65448
Troglodytes hiemalis	Winter Wren	Passeriformes	0.229167		LC		1.5189	7	0.00145524			0.9443	0.0549	0.0008	59.461	35.172	5.367	0.56098	0.33289	0.03313	0.05043	0.01855	0.0005	0.00322	0.00028	2e-05	1	1.64858
Oreothlypis celata	Orange-crowned Warbler	Passeriformes	0.0204082		LC	0.015593	0.48108	3	4.15235e-05	3.24125	0.519767	0.72217	0.26525	0.01258	95.917	4.042	0.041	0.69259	0.02927	0.25467	0.00031	0.01049	0.01191	9e-05	0.00066	1e-05	1	1.64629
Cygnus olor	Mute Swan	Anseriformes	0		LC	0.047498		4			1.18745	0.71288	0.26359	0.02353	100	0	0	0.71288	0	0.26359	0	0	0.02353	0	0	0	1	1.64483
Mimus polyglottos	Northern Mockingbird	Passeriformes	0.06		LC	0.037409	2.18618	6	2.10603e-05	1.71116	0.623483	0.76639	0.22518	0.00843	88.321	11.309	0.37	0.67704	0.08647	0.19892	0.00288	0.02552	0.00725	0.00074	0.0011	8e-05	1	1.64406
Anas clypeata	Northern Shoveler	Anseriformes	0.08		LC	0.057373		7			0.819614	0.7956	0.19289	0.01151	84.633	14.67	0.697	0.67393	0.11618	0.16285	0.00549	0.02868	0.00955	0.00136	0.00184	0.00012	1	1.64282
Mycteria americana	Wood Stork	Ciconiiformes	0.23913	E (AL, FL, GA, SC)	LC	0.009983		6			0.166383	0.95791	0.04165	0.00044	57.968	36.209	5.823	0.55547	0.34677	0.02395	0.05567	0.01517	0.00026	0.00253	0.00015	3e-05	1	1.64013
Sphyrapicus thyroideus	Williamson's Sapsucker	Piciformes	0.15		LC	0.008677	1.81923	2		0.476959	0.43385	0.86638	0.13023	0.00339	72.31	25.349	2.341	0.62658	0.21978	0.09419	0.02002	0.03274	0.00233	0.0033	0.00097	9e-05	1	1.63814
Pheucticus melanocephalus	Black-headed Grosbeak	Passeriformes	0		LC	0.019247	1.40991	2	2.93582e-05	1.36512	0.96235	0.70801	0.27532	0.01667	100	0	0	0.70801	0	0.27532	0	0	0.01667	0	0	0	1	1.63399
Petrochelidon fulva	Cave Swallow	Passeriformes	0		LC	0.069518		6			1.15863	0.71882	0.25869	0.02249	100	0	0	0.71882	0	0.25869	0	0	0.02249	0	0	0	1	1.62983
Calidris alpina	Dunlin	Charadriiformes	0.26	BCC	LC				0.000417266			0.9837	0.01624	6e-05	54.945	38.146	6.909	0.54019	0.37545	0.00922	0.06806	0.00599	4e-05	0.00103	2e-05	0	1	1.62855
Meleagris gallopavo	Wild Turkey	Galliformes	0.0612245		LC	0.068649		8			0.858113	0.78711	0.20052	0.01237	88.096	11.516	0.388	0.69396	0.09007	0.17636	0.00308	0.02346	0.01064	0.0007	0.00163	0.0001	1	1.61548
Myiarchus cinerascens	Ash-throated Flycatcher	Passeriformes	0.0238095		LC	0.034544	1.76046	5	3.52725e-05	1.96222	0.69088	0.74087	0.24839	0.01074	95.209	4.731	0.06	0.70533	0.03508	0.23667	0.00046	0.0116	0.01009	0.00012	0.00063	2e-05	1	1.61194
Myiarchus tyrannulus	Brown-crested Flycatcher	Passeriformes	0.0909091		LC	0.035897		5			0.71794	0.82004	0.17112	0.00884	82.595	16.509	0.896	0.67759	0.13511	0.14128	0.00734	0.02834	0.00708	0.0015	0.00164	0.00012	1	1.60989
Coccothraustes vespertinus	Evening Grosbeak	Passeriformes	0.0612245		LC	0.02501		3			0.833667	0.79253	0.19563	0.01184	88.096	11.516	0.388	0.69876	0.09065	0.17204	0.00312	0.02292	0.01016	0.00067	0.00159	9e-05	1	1.60244
Polioptila caerulea	Blue-gray Gnatcatcher	Passeriformes	0.125		LC	0.016014	1.00589	6	2.19331e-06	1.59202	0.2669	0.85413	0.14292	0.00295	76.608	21.746	1.646	0.65419	0.186	0.10968	0.01394	0.03079	0.00221	0.00245	0.00067	7e-05	1	1.60134
Bubulcus ibis	Western Cattle Egret	Pelecaniformes	0.16		LC	0.020239		5			0.40478	0.89641	0.10077	0.00282	70.567	26.774	2.659	0.6327	0.24007	0.07107	0.02364	0.02684	0.0019	0.00286	0.00083	9e-05	1	1.59368
Tringa melanoleuca	Greater Yellowlegs	Charadriiformes	0.26		LC	0		9			0	1	0	0	54.945	38.146	6.909	0.54945	0.38146	0	0.06909	0	0	0	0	0	1	1.58873
Phainopepla nitens	Phainopepla	Passeriformes	0.133333		LC	0.015088		3			0.502933	0.87248	0.12321	0.00431	75.183	22.938	1.879	0.65596	0.20028	0.09279	0.01624	0.02796	0.00308	0.00246	0.00114	9e-05	1	1.58528
Strix varia	Northern Barred Owl	Strigiformes	0.170213		LC	0.023925		7			0.341786	0.91185	0.08617	0.00198	68.76	28.244	2.996	0.62736	0.25751	0.05889	0.02698	0.02436	0.00135	0.00292	0.00057	6e-05	1	1.58241
Pelecanus occidentalis	Brown Pelican	Pelecaniformes	0.208333		LC	0.007829		4			0.195725	0.95002	0.04936	0.00062	62.677	32.898	4.425	0.59563	0.31258	0.03076	0.04181	0.01621	0.00038	0.00239	0.00019	5e-05	1	1.58234
Vireo cassinii	Cassin's Vireo	Passeriformes	0.047619		LC	0.010514	0.38832	3	7.3249e-05	2.70756	0.350467	0.77997	0.21244	0.00759	90.682	9.091	0.227	0.70751	0.07068	0.19248	0.00178	0.0195	0.00683	0.00046	0.00073	3e-05	1	1.58124
Poecile rufescens	Chestnut-backed Chickadee	Passeriformes	0.166667		LC	0.021026		6			0.350433	0.90991	0.08804	0.00205	69.387	27.724	2.889	0.63161	0.25231	0.06086	0.02599	0.02434	0.0014	0.00284	0.00059	6e-05	1	1.57801
Colaptes chrysoides	Gilded Flicker	Piciformes	0.25		LC	0.000669		3			0.0223	0.99455	0.00545	0	56.338	37.3	6.362	0.56019	0.37115	0.00319	0.06321	0.00185	0	0.00041	0	0	1	1.57702
Patagioenas fasciata	Band-tailed Pigeon	Columbiformes	0.153846		LC	0.02012		5			0.4024	0.89709	0.10011	0.0028	71.655	25.896	2.449	0.64305	0.23226	0.07159	0.02178	0.02589	0.00191	0.00263	0.00081	8e-05	1	1.57598
Archilochus alexandri	Black-chinned Hummingbird	Apodiformes	0.030303		LC	0.036845		4			0.921125	0.77297	0.21293	0.0141	93.996	5.913	0.091	0.72673	0.04548	0.2002	0.00076	0.01261	0.01303	0.00012	0.00104	3e-05	1	1.57199
Parkesia noveboracensis	Northern Waterthrush	Passeriformes	0.122449		LC	0.035445		7	8.2153e-05		0.506357	0.86896	0.12664	0.0044	77.032	21.384	1.584	0.66963	0.18567	0.09751	0.01366	0.02704	0.00318	0.00209	0.00113	9e-05	1	1.5669
Cardinalis cardinalis	Northern Cardinal	Passeriformes	0.0434783		LC	0.029927	1.27764	7		2.34237	0.427529	0.78231	0.21054	0.00715	91.428	8.381	0.191	0.71513	0.06561	0.19269	0.00157	0.01753	0.00646	0.00032	0.00067	2e-05	1	1.56489
Passerina amoena	Lazuli Bunting	Passeriformes	0.025		LC	0.018538		2			0.9269	0.77153	0.21417	0.0143	94.996	4.939	0.065	0.733	0.03798	0.20363	0.00055	0.01046	0.01333	8e-05	0.00095	2e-05	1	1.56267
Anas cyanoptera	Cinnamon Teal	Anseriformes	0.0444444		LC	0.016333		2			0.81665	0.79645	0.19209	0.01146	91.251	8.554	0.195	0.72704	0.06777	0.17529	0.00164	0.01652	0.01018	0.00028	0.00125	3e-05	1	1.55092
Salpinctes obsoletus	Rock Wren	Passeriformes	0		LC	0.020286		2			1.0143	0.75121	0.23159	0.0172	100	0	0	0.75121	0	0.23159	0	0	0.0172	0	0	0	1	1.54918
Catharus ustulatus	Swainson's Thrush	Passeriformes	0.122449		LC	0.011133	1.05156	4	7.55996e-05	1.05871	0.278325	0.87393	0.12387	0.0022	77.032	21.384	1.584	0.67335	0.18682	0.0953	0.01376	0.02655	0.00167	0.00202	0.00047	6e-05	1	1.54914
Plegadis falcinellus	Glossy Ibis	Pelecaniformes	0.229167		LC	0.001708		3			0.0569333	0.98544	0.01454	2e-05	59.461	35.172	5.367	0.58586	0.3467	0.00874	0.05288	0.00501	1e-05	0.00079	1e-05	0	1	1.54772
Sphyrapicus varius	Yellow-bellied Sapsucker	Piciformes	0.22449		LC			6	0.000448361			0.98236	0.01757	7e-05	60.19	34.657	5.153	0.59111	0.34055	0.01073	0.0507	0.00601	6e-05	0.00083	1e-05	0	1	1.5435
Piranga rubra	Summer Tanager	Passeriformes	0.125		LC	0.00757	0.5184	4		1.46026	0.18925	0.87927	0.11868	0.00205	76.608	21.746	1.646	0.67358	0.19135	0.09094	0.01434	0.02568	0.00156	0.00206	0.00043	6e-05	1	1.54262
Piranga flava	Hepatic Tanager	Passeriformes	0.0833333		LC	0.019058		3			0.635267	0.83965	0.15362	0.00673	84.032	15.209	0.759	0.70596	0.12731	0.12893	0.00638	0.02358	0.00543	0.00111	0.0012	0.0001	1	1.54164
Regulus calendula	Ruby-crowned Kinglet	Passeriformes	0.0408163		LC	0.015596		2	0.000278023		0.7798	0.7961	0.19351	0.01039	91.951	7.884	0.165	0.73243	0.06229	0.17774	0.00138	0.01553	0.00934	0.00024	0.00102	3e-05	1	1.53955
Passerina caerulea	Blue Grosbeak	Passeriformes	0.0416667		LC	0.024059		3			0.801967	0.80008	0.18898	0.01094	91.775	8.052	0.173	0.73461	0.06402	0.17337	0.00145	0.01536	0.00977	0.00025	0.00114	3e-05	1	1.53512
Chordeiles acutipennis	Lesser Nighthawk	Caprimulgiformes	0		LC	0.029406		3			0.9802	0.75906	0.22508	0.01586	100	0	0	0.75906	0	0.22508	0	0	0.01586	0	0	0	1	1.52946
Geothlypis philadelphia	Mourning Warbler	Passeriformes	0.0638298		LC	0.020816		3			0.693867	0.82564	0.16626	0.0081	87.592	11.983	0.425	0.72382	0.09831	0.14521	0.00351	0.02038	0.00689	0.00067	0.00114	7e-05	1	1.52779
Setophaga dominica	Yellow-throated Warbler	Passeriformes	0.208333		LC	0.005982		6			0.0997	0.97437	0.02554	9e-05	62.677	32.898	4.425	0.61075	0.32052	0.01598	0.0431	0.00842	4e-05	0.00114	4e-05	1e-05	1	1.52286
Vireo philadelphicus	Philadelphia Vireo	Passeriformes	0		LC	0.048253		5			0.96506	0.76266	0.22186	0.01548	100	0	0	0.76266	0	0.22186	0	0	0.01548	0	0	0	1	1.52112
Thalasseus maximus	Royal Tern	Charadriiformes	0.212121		LC	0.002374		3			0.0791333	0.97983	0.02014	3e-05	62.077	33.315	4.608	0.6083	0.32637	0.01246	0.04516	0.00677	1e-05	0.00091	1e-05	1e-05	1	1.51951
Stelgidopteryx serripennis	Northern Rough-winged Swallow	Passeriformes	0.102041		LC	0.030842		6			0.514033	0.86977	0.12567	0.00456	80.662	18.219	1.119	0.70191	0.15807	0.10124	0.00979	0.02312	0.00347	0.00131	0.001	9e-05	1	1.51533
Selasphorus sasin	Allen's Hummingbird	Apodiformes	0.04	BCC	LC	0.030817		4			0.770425	0.8075	0.18249	0.01001	92.119	7.724	0.157	0.74427	0.06191	0.16791	0.00132	0.01436	0.00901	0.00022	0.00097	3e-05	1	1.51253
Perisoreus canadensis	Gray Jay	Passeriformes	0.115385		LC	0.009034		2			0.4517	0.88479	0.11175	0.00346	78.276	20.299	1.425	0.69287	0.17937	0.08732	0.01255	0.02277	0.00257	0.00166	0.00085	4e-05	1	1.51182
Nucifraga columbiana	Clark's Nutcracker	Passeriformes	0.111111		LC	0.018484		4			0.4621	0.88229	0.11408	0.00363	79.073	19.595	1.332	0.69801	0.17252	0.09	0.01176	0.02256	0.00272	0.00152	0.00087	4e-05	1	1.50717
Pyrocephalus rubinus	Vermilion Flycatcher	Passeriformes	0.0227273		LC	0.04103		5			0.8206	0.79539	0.19306	0.01155	95.453	4.495	0.052	0.7594	0.03553	0.18432	0.00046	0.0087	0.01081	4e-05	0.00072	2e-05	1	1.49984
Podiceps nigricollis	Eared Grebe	Podicipediformes	0.14		LC	0.016342		5			0.32684	0.91565	0.0826	0.00175	74.033	23.9	2.067	0.67824	0.21872	0.06086	0.01869	0.0198	0.00123	0.00194	0.00048	4e-05	1	1.49718
Anthus rubescens	American Pipit	Passeriformes	0.06		LC		1.32188	8	0.00441905			0.83467	0.15781	0.00752	88.321	11.309	0.37	0.73717	0.09441	0.13952	0.00309	0.0177	0.00652	0.00059	0.00098	2e-05	1	1.49668
Tringa solitaria	Solitary Sandpiper	Charadriiformes	0.22	BCC	LC	0		6			0	1	0	0	60.838	34.209	4.953	0.60838	0.34209	0	0.04953	0	0	0	0	0	1	1.49068
Larus californicus	California Gull	Charadriiformes	0.0681818		LC	0.041701		7			0.595729	0.84949	0.14454	0.00597	86.807	12.698	0.495	0.73775	0.10749	0.12537	0.00425	0.01855	0.00495	0.00062	0.00094	8e-05	1	1.48087
Setophaga occidentalis	Hermit Warbler	Passeriformes	0.0909091		LC	0.009752		2			0.4876	0.87612	0.11977	0.00411	82.595	16.509	0.896	0.72389	0.14435	0.09885	0.00788	0.01989	0.00321	0.00103	0.00085	5e-05	1	1.47383
Callipepla gambelii	Gambel's Quail	Galliformes	0.111111		LC	0.012153		3			0.4051	0.89641	0.10077	0.00282	79.073	19.595	1.332	0.70924	0.17522	0.07939	0.01195	0.02005	0.0021	0.00133	0.00068	4e-05	1	1.47361
Aeronautes saxatalis	White-throated Swift	Apodiformes	0.181818		LC	0.006175		5			0.1235	0.96851	0.0313	0.00019	66.913	29.707	3.38	0.64819	0.28763	0.02082	0.03269	0.00938	0.00012	0.0011	6e-05	1e-05	1	1.47256
Sturnus vulgaris	European Starling	Passeriformes	0		LC	0.066619		8	0.000275383		0.832738	0.78402	0.20409	0.01189	100	0	0	0.78402	0	0.20409	0	0	0.01189	0	0	0	1	1.46763
Psaltriparus minimus	American Bushtit	Passeriformes	0.0769231		LC	0.02484	2.6649	7		0.932118	0.354857	0.86412	0.13306	0.00282	85.172	14.19	0.638	0.7364	0.12223	0.11302	0.00549	0.01919	0.0023	0.00085	0.00048	4e-05	1	1.46178
Vireo plumbeus	Plumbeous Vireo	Passeriformes	0.0555556		LC	0.012215		2			0.61075	0.84598	0.14782	0.0062	89.162	10.519	0.319	0.75474	0.08851	0.13164	0.00273	0.01576	0.00524	0.00042	0.00092	4e-05	1	1.4585
Setophaga townsendi	Townsend's Warbler	Passeriformes	0.0243902		LC	0.012253	2.42991	2	0.000328457	0.504257	0.61265	0.81201	0.18145	0.00654	95.1	4.838	0.062	0.7723	0.03918	0.17268	0.00053	0.0087	0.00602	7e-05	0.0005	2e-05	1	1.45511
Spinus pinus	Pine Siskin	Passeriformes	0.122449		LC	0.012717		4			0.317925	0.91791	0.08043	0.00166	77.032	21.384	1.584	0.7075	0.19596	0.0616	0.01445	0.01748	0.00122	0.00135	0.0004	4e-05	1	1.44975
Anas americana	American Wigeon	Anseriformes	0.08		LC	0.034351		7			0.490729	0.87533	0.12053	0.00414	84.633	14.67	0.697	0.74136	0.12791	0.10165	0.00606	0.01803	0.00332	0.00085	0.00076	6e-05	1	1.44901
Myadestes townsendi	Townsend's Solitaire	Passeriformes	0.0465116		LC	0.009976	0.717489	3	0.000291069	1.3904	0.332533	0.8377	0.15906	0.00324	90.865	8.92	0.215	0.76156	0.07429	0.14427	0.00185	0.01451	0.00282	0.00028	0.0004	2e-05	1	1.44516
Setophaga coronata	Yellow-rumped Warbler	Passeriformes	0.0612245		LC	0.017298	1.269	6	0.000133419	1.36312	0.2883	0.85542	0.14183	0.00275	88.096	11.516	0.388	0.75373	0.0983	0.12489	0.00339	0.01648	0.00234	0.00046	0.00038	3e-05	1	1.44153
Vireo huttoni	Hutton's Vireo	Passeriformes	0		LC	0.01625		2			0.8125	0.79743	0.19124	0.01133	100	0	0	0.79743	0	0.19124	0	0	0.01133	0	0	0	1	1.43913
Zenaida asiatica	White-winged Dove	Columbiformes	0		LC	0.031438		4			0.78595	0.80373	0.18575	0.01052	100	0	0	0.80373	0	0.18575	0	0	0.01052	0	0	0	1	1.4241
Vireo griseus	White-eyed Vireo	Passeriformes	0.125		LC	0.00566	0.752301	5	2.42708e-05	0.752358	0.1132	0.93213	0.06726	0.00061	76.608	21.746	1.646	0.71408	0.20274	0.05156	0.01531	0.01458	0.00044	0.00112	0.00014	3e-05	1	1.42025
Piranga ludoviciana	Western Tanager	Passeriformes	0.0416667		LC	0.012747	0.873981	4	6.06162e-05	1.4585	0.318675	0.84589	0.15097	0.00314	91.775	8.052	0.173	0.77635	0.06804	0.13863	0.0015	0.01213	0.00277	0.00021	0.00035	2e-05	1	1.41604
Melanerpes carolinus	Red-bellied Woodpecker	Piciformes	0.0227273		LC	0.023776	1.59039	6		1.49498	0.396267	0.8282	0.16757	0.00423	95.453	4.495	0.052	0.79053	0.03725	0.16009	0.00042	0.00739	0.00391	9e-05	0.00031	1e-05	1	1.41059
Empidonax oberholseri	American Dusky Flycatcher	Passeriformes	0.0416667		LC	0.010314	0.6156	4		1.67544	0.25785	0.85242	0.14457	0.00301	91.775	8.052	0.173	0.78214	0.06876	0.13284	0.00152	0.01154	0.00277	0.00019	0.00022	2e-05	1	1.40185
Setophaga nigrescens	Black-throated Gray Warbler	Passeriformes	0.0666667		LC	0.011565		3	0.000348725		0.3855	0.88912	0.10823	0.00265	87.083	12.446	0.471	0.77474	0.11014	0.09391	0.00424	0.01389	0.00218	0.00043	0.00043	4e-05	1	1.38305
Archilochus colubris	Ruby-throated Hummingbird	Apodiformes	0.0625		LC	0.026607		6	2.69173e-05		0.44345	0.88554	0.11112	0.00334	87.843	11.755	0.402	0.77843	0.10351	0.09726	0.0036	0.01348	0.00274	0.00038	0.00056	4e-05	1	1.38297
Calypte anna	Anna's Hummingbird	Apodiformes	0.0277778		LC	0.0342		6			0.57	0.85571	0.13869	0.0056	94.443	5.479	0.078	0.80832	0.04669	0.13105	0.0007	0.00759	0.00506	5e-05	0.00051	3e-05	1	1.37066
Pipilo chlorurus	Green-tailed Towhee	Passeriformes	0.0208333		LC	0.01505	1.36832	4	8.6681e-05	1.09989	0.37625	0.84758	0.1491	0.00332	95.831	4.127	0.042	0.8124	0.03482	0.14286	0.00036	0.00619	0.00305	5e-05	0.00026	1e-05	1	1.36383
Sayornis saya	Say's Phoebe	Passeriformes	0		LC	0.026953		4			0.673825	0.83047	0.16188	0.00765	100	0	0	0.83047	0	0.16188	0	0	0.00765	0	0	0	1	1.36201
Pipilo maculatus	Spotted Towhee	Passeriformes	0.0434783		LC	0.019112		4	2.22188e-05		0.4778	0.87741	0.11871	0.00388	91.428	8.381	0.191	0.80232	0.07335	0.10857	0.00174	0.00998	0.00339	0.00016	0.00048	1e-05	1	1.35698
Sialia sialis	Eastern Bluebird	Passeriformes	0.0465116		LC	0.02694		6			0.449	0.88537	0.11124	0.00339	90.865	8.92	0.215	0.80483	0.07855	0.1009	0.00199	0.01019	0.00292	0.00015	0.00046	1e-05	1	1.34588
Passer domesticus	House Sparrow	Passeriformes	0		LC	0.083219		13	2.20088e-05		0.640146	0.83748	0.15567	0.00685	100	0	0	0.83748	0	0.15567	0	0	0.00685	0	0	0	1	1.34559
Cyanocitta stelleri	Steller's Jay	Passeriformes	0.0555556		LC	0.015102		4			0.37755	0.90302	0.09452	0.00246	89.162	10.519	0.319	0.80578	0.09432	0.0838	0.00292	0.01047	0.00204	0.00025	0.0004	2e-05	1	1.32722
Callipepla californica	California Quail	Galliformes	0		LC	0.041786		7			0.596943	0.84922	0.1448	0.00598	100	0	0	0.84922	0	0.1448	0	0	0.00598	0	0	0	1	1.3195
Oporornis agilis	Connecticut Warbler	Passeriformes	0.0888889		LC	0.006911		3			0.230367	0.94128	0.05787	0.00085	82.961	16.186	0.853	0.78153	0.1517	0.04739	0.00805	0.01	0.00069	0.00048	0.00016	0	1	1.31808
Selasphorus platycercus	Broad-tailed Hummingbird	Apodiformes	0.0714286		LC	0.014785		5			0.2957	0.92382	0.0747	0.00148	86.201	13.257	0.542	0.7968	0.12194	0.06399	0.00508	0.0104	0.00122	0.00031	0.00023	3e-05	1	1.31657
Geothlypis tolmiei	MacGillivray's Warbler	Passeriformes	0.0526316		LC	0.009961	1.74763	4	0.000132067	0.569972	0.249025	0.90338	0.09527	0.00135	89.744	9.976	0.28	0.81098	0.0898	0.08527	0.0026	0.00982	0.00119	0.00018	0.00014	2e-05	1	1.31559
Baeolophus bicolor	Tufted Titmouse	Passeriformes	0.0540541		LC	0.021447		6	1.5625e-05		0.35745	0.90737	0.09047	0.00216	89.45	10.251	0.299	0.81226	0.09238	0.08044	0.00273	0.00978	0.0018	0.00025	0.00035	1e-05	1	1.3136
Zonotrichia leucophrys	White-crowned Sparrow	Passeriformes	0.0408163		LC	0.014708	1.49787	7	0.000141019	0.981928	0.210114	0.89241	0.10612	0.00147	91.951	7.884	0.165	0.82059	0.07032	0.09756	0.0015	0.00841	0.00136	0.00015	0.00011	0	1	1.31205
Setophaga pinus	Pine Warbler	Passeriformes	0.0425532		LC	0.006073	1.13821	2	1.68998e-05	0.533559	0.30365	0.8952	0.103	0.0018	91.609	8.209	0.182	0.82019	0.07334	0.09433	0.00167	0.00853	0.00157	0.00014	0.00022	1e-05	1	1.31144
Anhinga anhinga	Anhinga	Suliformes	0.142857		LC	0		1			0	1	0	0	73.535	24.316	2.149	0.73535	0.24316	0	0.02149	0	0	0	0	0	1	1.30763
Mergus merganser	Common Merganser	Anseriformes	0.04		LC	0.01508		5	0.000703558		0.3016	0.8969	0.10137	0.00173	92.119	7.724	0.157	0.82646	0.06899	0.09319	0.00145	0.00807	0.00154	0.00011	0.00018	1e-05	1	1.3017
Coragyps atratus	Black Vulture	Accipitriformes	0.097561		LC	0.012594		8			0.157425	0.96003	0.03959	0.00038	81.454	17.513	1.033	0.78248	0.16766	0.03178	0.00989	0.00737	0.00028	0.00044	0.0001	0	1	1.29511
Selasphorus rufus	Rufous Hummingbird	Apodiformes	0.0816327	BCC	LC	0.009913		5			0.19826	0.94937	0.05001	0.00062	84.354	14.923	0.723	0.80146	0.14106	0.04155	0.00685	0.00808	0.00053	0.00038	9e-05	0	1	1.28259
Bucephala islandica	Barrow's Goldeneye	Anseriformes	0.121951		LC	0.001358		4			0.03395	0.99124	0.00875	1e-05	77.112	21.312	1.576	0.76429	0.21133	0.00683	0.01562	0.00178	0	0.00014	1e-05	0	1	1.27988
Empidonax wrightii	American Gray Flycatcher	Passeriformes	0.05		LC	0.010707		4			0.267675	0.9312	0.06758	0.00122	90.229	9.516	0.255	0.84043	0.0883	0.06081	0.00247	0.0067	0.00105	7e-05	0.00016	1e-05	1	1.251
Melospiza lincolnii	Lincoln's Sparrow	Passeriformes	0.0204082		LC	0.01061	1.3425	5	0.000115371	0.790317	0.2122	0.90253	0.09625	0.00122	95.917	4.042	0.041	0.8655	0.03666	0.09253	0.00037	0.00368	0.00114	4e-05	8e-05	0	1	1.24405
Pica hudsonia	Black-billed Magpie	Passeriformes	0.0333333		LC	0.02851		10	0.000234568		0.2851	0.91789	0.08066	0.00145	93.406	6.491	0.103	0.85747	0.05943	0.07527	0.00099	0.00536	0.00132	3e-05	0.00012	1e-05	1	1.24208
Cardellina pusilla	Wilson's Warbler	Passeriformes	0.0204082		LC	0.013941	1.13424	12	0.000116171	1.2291	0.116175	0.90376	0.09496	0.00128	95.917	4.042	0.041	0.86677	0.03663	0.09121	0.00036	0.0037	0.00119	5e-05	9e-05	0	1	1.24181
Tachycineta thalassina	Violet-green Swallow	Passeriformes	0.0666667		LC	0.013592		8			0.1699	0.9568	0.04275	0.00045	87.083	12.446	0.471	0.83369	0.11857	0.03675	0.00454	0.00583	0.00039	0.00017	6e-05	0	1	1.2324
Ixoreus naevius	Varied Thrush	Passeriformes	0.0208333		LC	0.005621	1.584	2	1.62738e-05	0.354861	0.28105	0.90963	0.08892	0.00145	95.831	4.127	0.042	0.87165	0.0376	0.08531	0.00038	0.00358	0.00135	3e-05	9e-05	1e-05	1	1.23132
Poecile gambeli	Mountain Chickadee	Passeriformes	0		LC	0.012305	1.81724	4		0.677124	0.307625	0.88828	0.10975	0.00197	100	0	0	0.88828	0	0.10975	0	0	0.00197	0	0	0	1	1.22935
Poecile carolinensis	Carolina Chickadee	Passeriformes	0.0416667		LC	0.010007	3.3345	5		0.300105	0.20014	0.93366	0.06563	0.00071	91.775	8.052	0.173	0.85689	0.07513	0.0602	0.00164	0.00534	0.00066	9e-05	5e-05	0	1	1.226
Eudocimus albus	American White Ibis	Pelecaniformes	0.0652174		LC	0.004791		3			0.1597	0.95934	0.04026	0.0004	87.343	12.208	0.449	0.83825	0.11675	0.03484	0.00434	0.00527	0.00034	0.00015	6e-05	0	1	1.22355
Sialia currucoides	Mountain Bluebird	Passeriformes	0.047619		LC	0.014756		7			0.2108	0.94602	0.05326	0.00072	90.682	9.091	0.227	0.85818	0.08564	0.048	0.0022	0.00519	0.00064	7e-05	8e-05	0	1	1.21318
Selasphorus calliope	Calliope Hummingbird	Apodiformes	0	BCC	LC	0.019372		5			0.38744	0.90086	0.09652	0.00262	100	0	0	0.90086	0	0.09652	0	0	0.00262	0	0	0	1	1.20614
Empidonax hammondii	Hammond's Flycatcher	Passeriformes	0.0357143		LC	0.009143		4	6.88722e-05		0.228575	0.93889	0.06026	0.00085	92.958	6.922	0.12	0.87291	0.06483	0.05586	0.00115	0.00435	0.00081	5e-05	4e-05	0	1	1.20203
Porphyrio martinicus	Purple Gallinule	Gruiformes	0.0952381		LC	0		1			0	1	0	0	81.875	17.148	0.977	0.81875	0.17148	0	0.00977	0	0	0	0	0	1	1.20079
Oreothlypis peregrina	Tennessee Warbler	Passeriformes	0.0408163		LC	0.008602		4			0.21505	0.945	0.05426	0.00074	91.951	7.884	0.165	0.86912	0.07428	0.0497	0.0016	0.00451	0.00069	5e-05	5e-05	0	1	1.20062
Passerella iliaca	Fox Sparrow	Passeriformes	0.0204082		LC	0.011361		4			0.284025	0.92708	0.07152	0.0014	95.917	4.042	0.041	0.88933	0.03736	0.06853	0.00039	0.00298	0.00131	1e-05	8e-05	1e-05	1	1.19476
Setophaga palmarum	Palm Warbler	Passeriformes	0.0408163		LC	0.015836		8			0.19795	0.94937	0.05001	0.00062	91.951	7.884	0.165	0.87309	0.07468	0.04584	0.0016	0.00412	0.00058	5e-05	4e-05	0	1	1.19112
Megascops kennicottii	Western Screech-Owl	Strigiformes	0.0666667		LC	0.006833		9			0.0759222	0.98058	0.01939	3e-05	87.083	12.446	0.471	0.85385	0.12208	0.01695	0.00465	0.00238	3e-05	6e-05	0	0	1	1.17996
Larus glaucescens	Glaucous-winged Gull	Charadriiformes	0		LC	0.02259		7			0.322714	0.91675	0.08153	0.00172	100	0	0	0.91675	0	0.08153	0	0	0.00172	0	0	0	1	1.17166
Pinicola enucleator	Pine Grosbeak	Passeriformes	0.0465116		LC	0.006641		5			0.13282	0.96605	0.03371	0.00024	90.865	8.92	0.215	0.87802	0.08592	0.03042	0.00211	0.00325	0.00021	4e-05	3e-05	0	1	1.16759
Thryothorus ludovicianus	Carolina Wren	Passeriformes	0.047619		LC	0.004754		4			0.11885	0.96997	0.02987	0.00016	90.682	9.091	0.227	0.87969	0.08806	0.02699	0.00222	0.00283	0.00014	5e-05	2e-05	0	1	1.16116
Quiscalus major	Boat-tailed Grackle	Passeriformes	0.0666667		LC	0.000564		3			0.0188	0.9955	0.0045	0	87.083	12.446	0.471	0.86689	0.12391	0.00394	0.0047	0.00055	0	1e-05	0	0	1	1.14815
Catharus minimus	Gray-cheeked Thrush	Passeriformes	0.0625		LC			4	5.9034e-05			0.99762	0.00237	1e-05	87.843	11.755	0.402	0.87636	0.11726	0.00206	0.004	0.00029	1e-05	2e-05	0	0	1	1.13471
Bucephala clangula	Common Goldeneye	Anseriformes	0.02		LC	0.004104		4			0.1026	0.97349	0.02641	0.0001	95.994	3.967	0.039	0.9345	0.03861	0.02535	0.00038	0.00105	9e-05	1e-05	1e-05	0	1	1.09523
Spizella arborea	American Tree Sparrow	Passeriformes	0.0408163		LC			6	3.73519e-05			0.99842	0.00158	0	91.951	7.884	0.165	0.91804	0.07874	0.00147	0.00164	0.0001	0	1e-05	0	0	1	1.08706
Zonotrichia atricapilla	Golden-crowned Sparrow	Passeriformes	0.027027		LC		1.35618	6	0.000179348			0.99276	0.00721	3e-05	94.579	5.345	0.076	0.93899	0.05301	0.00677	0.00076	0.00044	3e-05	0	0	0	1	1.07074
Corvus ossifragus	Fish Crow	Passeriformes	0		LC	0.002744		3			0.0914667	0.97697	0.02296	7e-05	100	0	0	0.97697	0	0.02296	0	0	7e-05	0	0	0	1	1.04627
Streptopelia decaocto	Eurasian Collared-Dove	Columbiformes	0		LC	0.002024		6			0.0337333	0.99124	0.00875	1e-05	100	0	0	0.99124	0	0.00875	0	0	1e-05	0	0	0	1	1.01755
Calcarius lapponicus	Lapland Longspur	Passeriformes	0		LC		1.12484	4	8.97833e-05			0.99644	0.00355	1e-05	100	0	0	0.99644	0	0.00355	0	0	1e-05	0	0	0	1	1.00715
Acanthis flammea	Common Redpoll	Passeriformes	0		LC			4	3.85631e-06			0.99981	0.00019	0	100	0	0	0.99981	0	0.00019	0	0	0	0	0	0	1	1.00038
Brotogeris chiriri	Yellow-chevroned Parakeet	Psittaciformes	0		LC	0		3			0	1	0	0	100	0	0	1	0	0	0	0	0	0	0	0	1	1
